# Supplementary material for: CRISPR-Cas9-Mediated Cytosine Base Editing Screen for the Functional Assessment of CALR Intron Variants in Japanese Encephalitis Virus Replication
Source: MDPI journal article supplement (doi:10.3390/ijms241713331), 2023-08-28
Supplement: s1 [file s1]

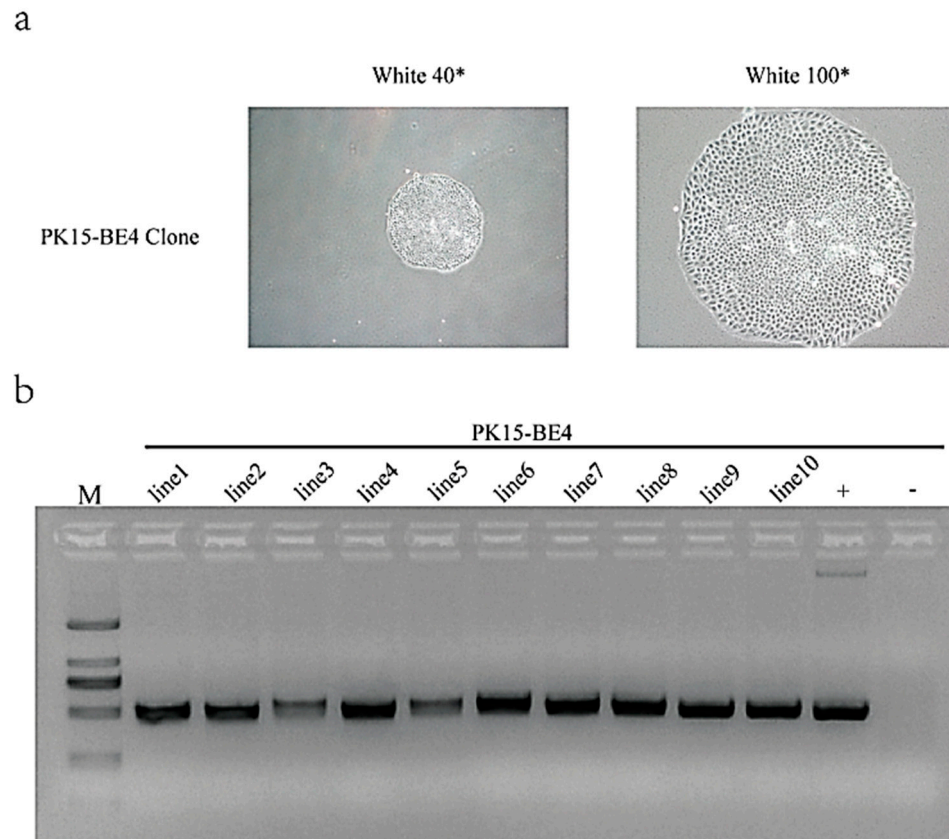

**Figure S1.** The generation and identification of PK15-BE4 clone lines. (a) The Morphology of PK15-BE4 cell clone before being picked up. (b) PCR amplification of the partial sequence of Cas9. M, marker; +, positive control (plasmid); -, negative control (wild-type PK15 DNA). Each lane refers to a cell line, respectively.

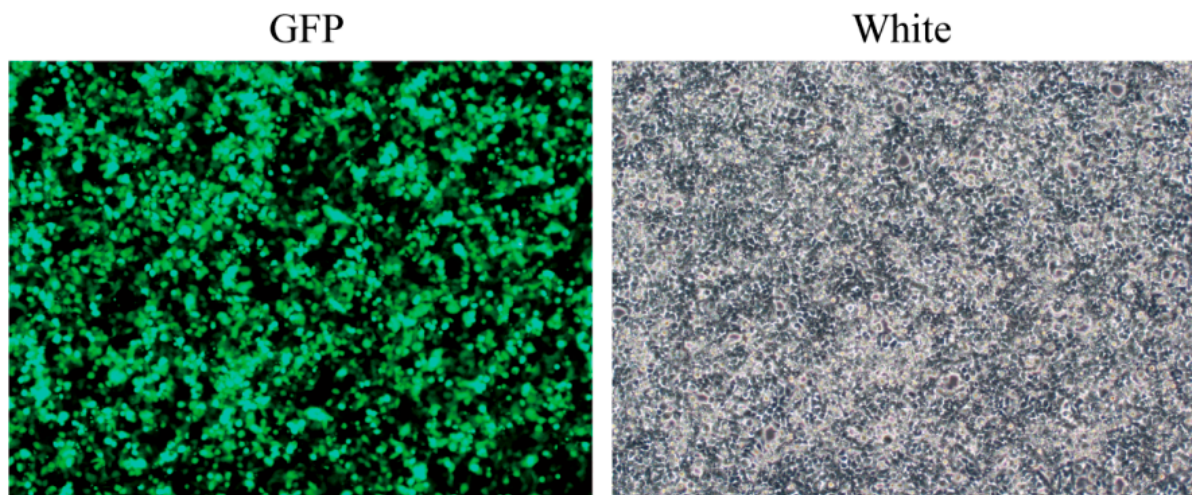

**Figure S2.** The efficiency of packaging of the sgRNA plasmid library.

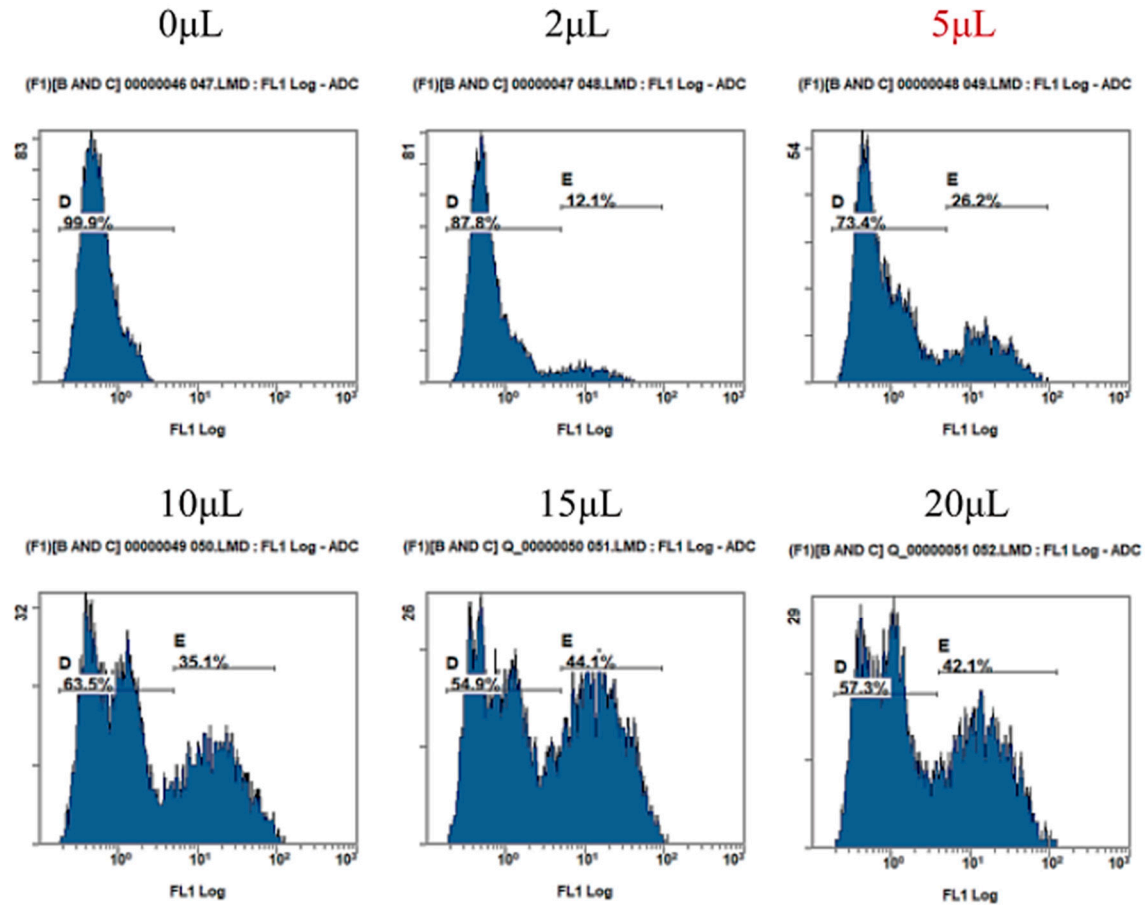

**Figure S3.** The optimal dose of the library lentivirus for the PK15-BE4 cells by FACS. The PK15-BE4 cells were infected with 6 different doses (μL) (0, 2, 5, 10, 15, 20), and the optimal dose with MOI < 0.3 was determined by FACS.

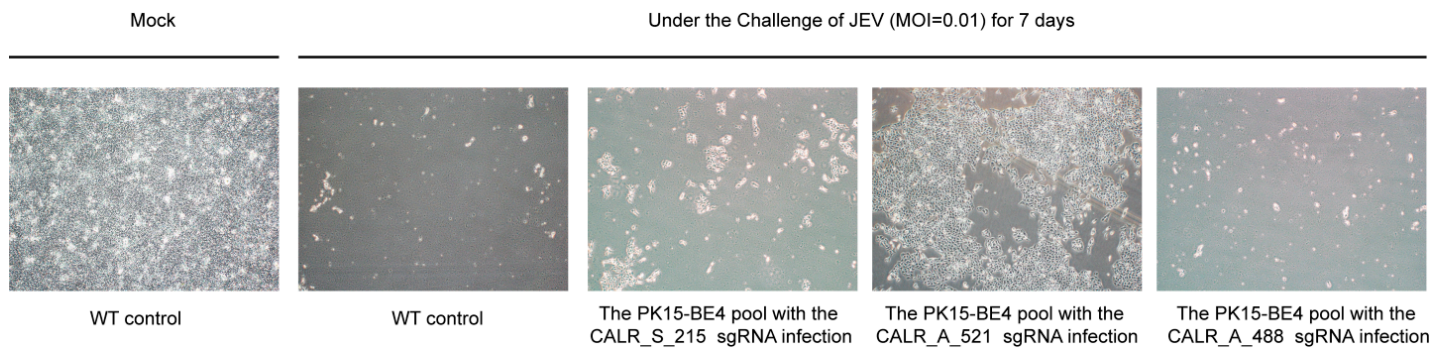

**Figure S4.** Comparison of the ability of three PK15-BE4 cell pools with the individual (top3) sgRNA infection and wild-type cells to resist JEV-induced cell death using cell proliferation assays.

5' ..... AGGGGCAGTCGTCTCTATTTCCACATAAGGGTACTCCGGGATTGGGCTGAGCCGTGAC ..... 3' WT

PAM sgRNA

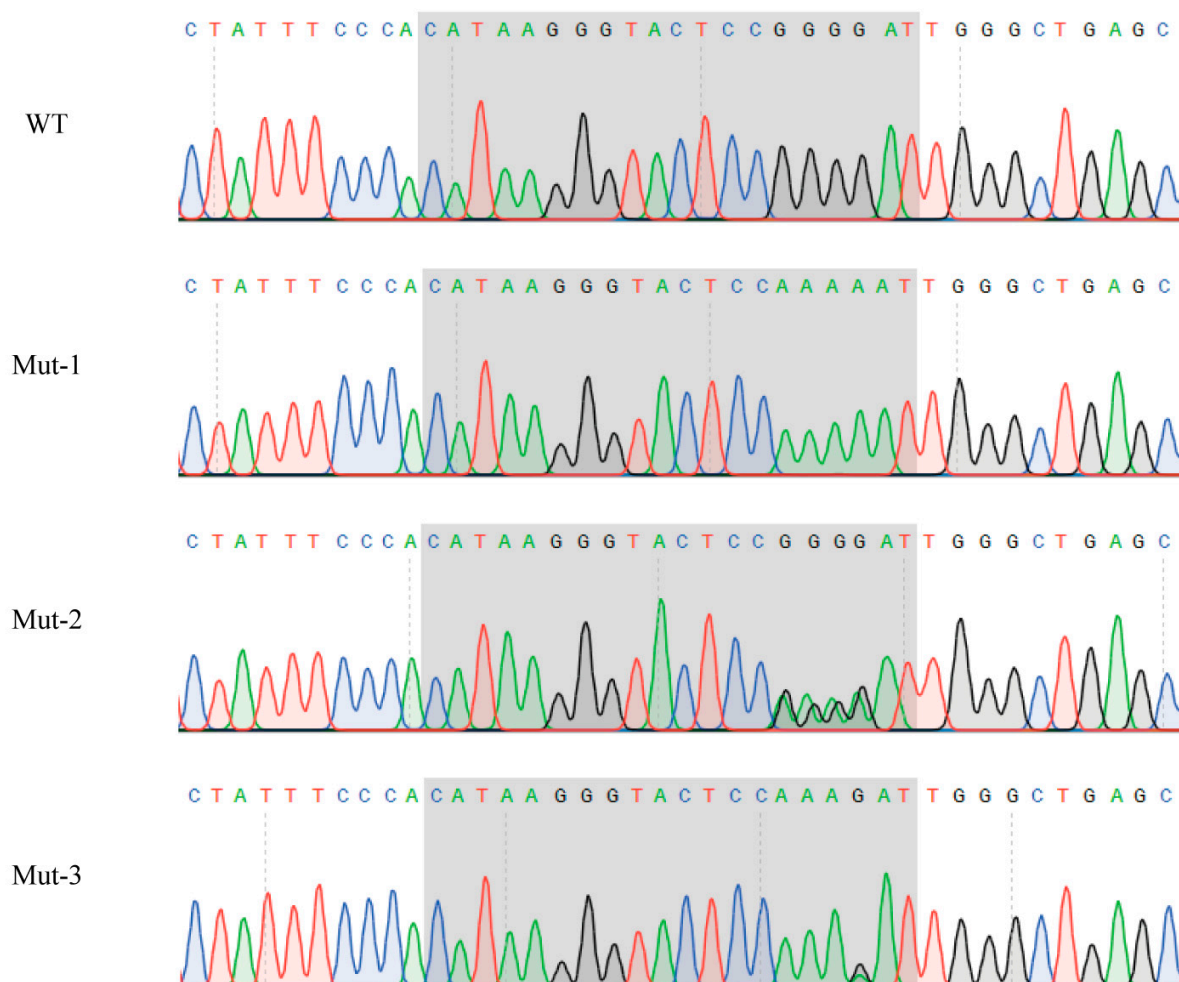

**Figure S5.** The sequence information of the Mut-1, Mut-2, and Mut-3. The shaded area refers to the sgRNA sequence.

a

| # | Potential OTS    | Sequence(5' to 3')       | Indel |
|---|------------------|--------------------------|-------|
|   | CALR_A_521-sgRNA | ATCCCCGGAGTACCCTTATG TGG |       |
| 1 | Potential OTS 1  | GTCTCGGAGGACCCTTGTG TGG  | NO    |
| 2 | Potential OTS 2  | ATCTCGGAGTGCGTTTATG GGG  | NO    |
| 3 | Potential OTS 3  | AACACAGGACTACCCTTATG AGG | NO    |
| 4 | Potential OTS 4  | ATCTCCAGATTACCCTTCTG TGG | NO    |
| 5 | Potential OTS 5  | ATGCCAGGAGTACCTTTCTG TGG | NO    |
| 6 | Potential OTS 6  | ATCTCGAAGTTCCTATATG GGG  | NO    |

b

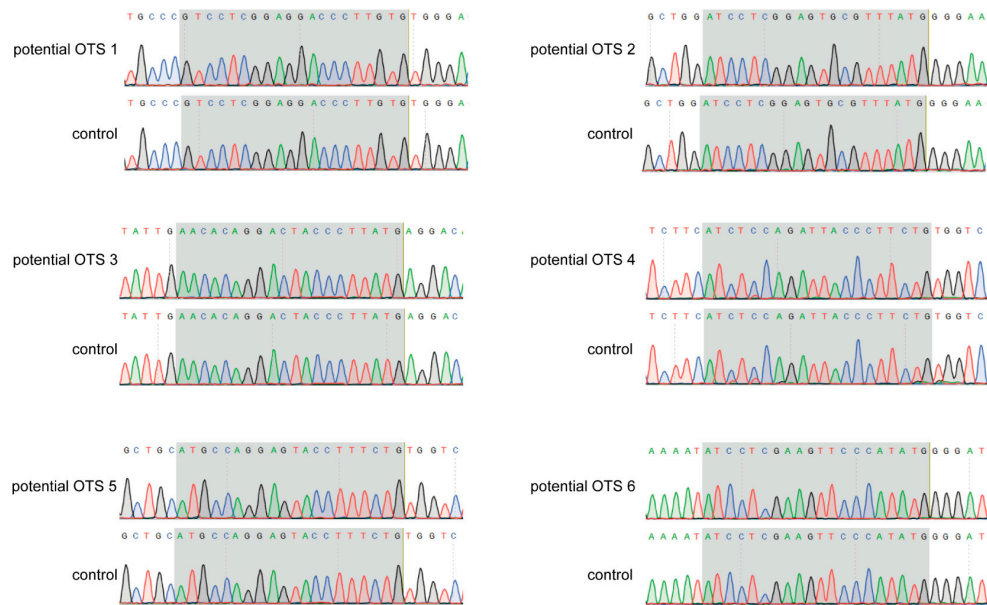

**Figure S6.** The evaluation of off-target effects of the sgRNA (CALR\_A\_521). **(a)** Six potential off-target sites were selected, and the off-target results were identified by PCR-sequencing. Blue letters indicate the PAM sequence. Red letters mark differences in sgRNA compared with the target sequence. The indel column shows the detected off-target results. **(b)** The sequence information for the potential off-target sites in Mut-1 and wild-type cells. The shaded area refers to the potential off-target site.
