# Supplementary material for: CRISPR-Cas9-Mediated Cytosine Base Editing Screen for the Functional Assessment of CALR Intron Variants in Japanese Encephalitis Virus Replication
Source: Int J Mol Sci. 2023 Aug 28;24(17):13331. doi: 10.3390/ijms241713331 (PMC10487596; doi:10.3390/ijms241713331)
Supplement: Supplementary file 1 [file ijms-24-13331-s001.zip]

Archive with 6 entries (6 files):
- ijms-2500390-supplementary.pdf
- Supplementary Table S1_Primers_sgRNA_sequences.xls
- Supplementary Table S2_sgRNA_plasmid_library_sequence_abundance.xls
- Supplementary Table S3_Deep_sequencing_mutant_cell_librry.xls
- Supplementary Table S4_Deep_sequencing_surviving cells.xls
- Supplementary Table S5_CALR_mutation_probe_library.xls
