# Supplementary material for: CRISPR-Cas9-Mediated Cytosine Base Editing Screen for the Functional Assessment of CALR Intron Variants in Japanese Encephalitis Virus Replication
Source: Int J Mol Sci. 2023 Aug 28;24(17):13331. doi: 10.3390/ijms241713331 (PMC10487596; doi:10.3390/ijms241713331)
Supplement: Supplementary file 1 [file ijms-24-13331-s001.zip › Supplementary Table S1_Primers_sgRNA_sequences.xls]

## Sheet: Sheet1
All primers used in this study			All sgRNAs used in this study
Primer	sequence(5'to3')		sgRNA	sequence(5'to3')
sgRNA Library-DeepSeq-214bp-F	GTGGAAAGGACGAAACACCG		SLC35B2 site-ontarget-sgRNA	GTCTCTGCTGGCTCTGACCG
sgRNA Library-DeepSeq-214bp-R	GCGGTACCTCTAGAGCCATT		DRG1 site-ontarget-sgRNA	GTTCCTGGAAGTTTAGATCA
BE4-seq-520bp-F	ggcgtggaagatcggttcaa		Lib CALR-sgRNA1	CTCCCAGTCCCACTACTGCT
BE4-seq-520bp-R	tgtgccggcccatcactttc		Lib CALR-sgRNA2	TCGAGGCCTCTCTAACGAGG
SLC35B2 site-seq-637bp-F	ACGCTGTAAGGTCAGCATCTC		Lib CALR-sgRNA3	GCTCATCTCCTACTCTCTTC
SLC35B2 site-seq-637bp-R	GGAAAGGGTGGGTAAGTGTGTT		Lib CALR-sgRNA4	ACTTACCCCAACAACCTAGA
DRG1 site-seq-652bp-F	TTGGCTAATGGCTTTGCTTGG		CALR_S_215-sgRNA	CATAAGGGTACTCCGGGGAT
DRG1 site-seq-652bp-R	GAGTCCCCTTTCCAGACTGAAG		CALR_A_521-sgRNA	ATCCCCGGAGTACCCTTATG
Lib CALR-sgRNA1 target-seq-662bp-F	CAGGACCAGGTTGGTTTGAGA		CALR_A_488-sgRNA	CGTCTGACCCTTGTTGCTGA
Lib CALR-sgRNA1 target-seq-662bp-R	TTGCCGGAACTGAGAACGAAT		CALR_A_521-sgRNA potential OTS 1	GTCCTCGGAGGACCCTTGTGTGG
Lib CALR-sgRNA2 target-seq-662bp-F	CAGGACCAGGTTGGTTTGAGA		CALR_A_521-sgRNA potential OTS 2	ATCCTCGGAGTGCGTTTATGGGG
Lib CALR-sgRNA2 target-seq-662bp-R	TTGCCGGAACTGAGAACGAAT		CALR_A_521-sgRNA potential OTS 3	AACACAGGACTACCCTTATGAGG
Lib CALR-sgRNA3 target-seq-621bp-F	CCTACTTCTCACCAAGGCCC		CALR_A_521-sgRNA potential OTS 4	ATCTCCAGATTACCCTTCTGTGG
Lib CALR-sgRNA3 target-seq-621bp-R	AGTCCCAGGCTCACCTTGTA		CALR_A_521-sgRNA potential OTS 5	ATGCCAGGAGTACCTTTCTGTGG
Lib CALR-sgRNA4 target-seq-657bp-F	CCCTTCTTCTGCAGGGTGAG		CALR_A_521-sgRNA potential OTS 6	ATCCTCGAAGTTCCCATATGGGG
Lib CALR-sgRNA4 target-seq-657bp-R	CCCATAACCATTACACAATGTTGC
CALR_A_521-sgRNA target-seq-504bp-F	TCGTTCTCAGTTCCGGCAAA
CALR_A_521-sgRNA target-seq-504bp-R	AGGAACACACGGGGTTTCAG
JEV-RP9-qPCR-180bp-F	GAGCTTGTTGGACGGCAGAG
JEV-RP9-qPCR-180bp-R	CACGGCGTCGATGAGTGTTC
GAPDH-qPCR-194bp-F	CGTCCCTGAGACACGATGGT
GAPDH-qPCR-194bp-R	GCCTTGACTGTGCCGTGGAAC
Potential OTS 1-seq-545bp-F	CCAAAGCCATTCTCTGGGTG
Potential OTS 1-seq-545bp-R	TAGCTTGAAGTTCTTGCGGC
Potential OTS 2-seq-499bp-F	CACCAGGAGTCCAGGGTTTC
Potential OTS 2-seq-499bp-R	GGGGCAGGAAACTGATGTGA
Potential OTS 3-seq-515bp-F	ACTTGGTCCTGCACCTGTTG
Potential OTS 3-seq-515bp-R	ATCTGGTGAGTTGCAATCTGTCT
Potential OTS 4-seq-346bp-F	ATCCTGCTGACTGTGATGGC
Potential OTS 4-seq-346bp-R	AGGTCCTTAGGGAGCACAGA
Potential OTS 5-seq-468bp-F	AAGGCTGCATTGTGTGCAAG
Potential OTS 5-seq-468bp-R	TTGGCTGGGCTAGTGAAGTG
Potential OTS 6-seq-461bp-F	GGCGGGTTGGTGGCATAAA
Potential OTS 6-seq-461bp-R	ACCCAGTGGAATCTGTAAGGC
