# Supplementary material for: CRISPR-Cas9-Mediated Cytosine Base Editing Screen for the Functional Assessment of CALR Intron Variants in Japanese Encephalitis Virus Replication
Source: Int J Mol Sci. 2023 Aug 28;24(17):13331. doi: 10.3390/ijms241713331 (PMC10487596; doi:10.3390/ijms241713331)
Supplement: Supplementary file 1 [file ijms-24-13331-s001.zip › Supplementary Table S2_sgRNA_plasmid_library_sequence_abundance.xls]

## Sheet: 60_result
sgRNA	gene	sample1	sample2	sample1	sample2
CALR_S_139	CALR	24759	24378	24759	24478.5
CALR_S_408	CALR	15032	14854	15032	14915.2
CALR_S_572	CALR	13003	12842	13003	12894.9
CALR_A_237	CALR	12949	12859	12949	12912
CALR_A_293	CALR	11592	11494	11592	11541.4
CALR_S_73	CALR	11167	11100	11167	11145.7
CALR_S_587	CALR	10928	10777	10928	10821.4
ntc_61_90_m	ntc	10394	10370	10394	10412.7
CALR_A_158	CALR	9522	9519	9521.98	9558.23
CALR_A_4	CALR	9132	9562	9131.98	9601.41
CALR_S_726	CALR	9076	9063	9075.98	9100.35
CALR_S_407	CALR	9029	8906	9028.98	8942.71
CALR_A_238	CALR	8719	8745	8718.98	8781.04
CALR_S_637	CALR	8557	8473	8556.98	8507.92
CALR_A_134	CALR	8299	8317	8298.98	8351.28
CALR_S_67	CALR	8315	8255	8314.98	8289.02
CALR_A_243	CALR	7863	7830	7862.98	7862.27
CALR_S_13	CALR	7610	7450	7609.99	7480.71
CALR_S_501	CALR	7518	7438	7517.99	7468.66
CALR_A_631	CALR	7405	7382	7404.99	7412.43
CALR_S_3	CALR	7400	7250	7399.99	7279.88
CALR_A_456	CALR	7182	7170	7181.99	7199.55
CALR_A_517	CALR	7163	7001	7162.99	7029.86
CALR_S_293	CALR	7064	7093	7063.99	7122.23
CALR_S_81	CALR	7035	7025	7034.99	7053.95
CALR_S_191	CALR	6934	6865	6933.99	6893.29
CALR_A_166	CALR	6671	6514	6670.99	6540.85
CALR_S_907	CALR	6457	6708	6456.99	6735.65
CALR_A_173	CALR	6303	6291	6302.99	6316.93
CALR_S_619	CALR	6303	6291	6302.99	6316.93
CALR_S_78	CALR	6232	6259	6231.99	6284.8
CALR_A_619	CALR	6232	6259	6231.99	6284.8
CALR_A_692	CALR	6163	6256	6162.99	6281.78
CALR_A_590	CALR	6237	6177	6236.99	6202.46
CALR_A_279	CALR	6188	6157	6187.99	6182.38
CALR_S_434	CALR	6092	5994	6091.99	6018.7
CALR_A_368	CALR	5917	5853	5916.99	5877.12
CALR_A_215	CALR	5851	5800	5850.99	5823.91
CALR_S_382	CALR	5658	5608	5657.99	5631.11
CALR_A_378	CALR	5637	5581	5636.99	5604
CALR_S_252	CALR	5535	5497	5534.99	5519.66
CALR_A_159	CALR	5471	5491	5470.99	5513.63
CALR_S_906	CALR	5294	5432	5293.99	5454.39
CALR_A_695	CALR	5319	5309	5318.99	5330.88
CALR_S_613	CALR	5267	5256	5266.99	5277.66
CALR_S_57	CALR	5249	5231	5248.99	5252.56
CALR_A_620	CALR	5259	5140	5258.99	5161.18
CALR_S_120	CALR	5185	5140	5184.99	5161.18
CALR_A_47	CALR	5101	5096	5100.99	5117
CALR_A_530	CALR	5025	4949	5024.99	4969.4
CALR_A_2	CALR	4965	4906	4964.99	4926.22
CALR_S_896	CALR	4665	4634	4664.99	4653.1
CALR_A_521	CALR	4662	4624	4661.99	4643.06
CALR_S_215	CALR	4662	4624	4661.99	4643.06
CALR_A_32	CALR	4663	4443	4662.99	4461.31
CALR_S_380	CALR	4567	4538	4566.99	4556.7
CALR_A_192	CALR	4518	4493	4517.99	4511.52
CALR_S_579	CALR	4506	4482	4505.99	4500.47
CALR_A_112	CALR	4501	4483	4500.99	4501.48
CALR_S_262	CALR	4415	4424	4414.99	4442.23
CALR_S_541	CALR	4421	4372	4420.99	4390.02
CALR_A_622	CALR	4278	4252	4277.99	4269.53
CALR_S_789	CALR	4225	4203	4224.99	4220.32
CALR_S_149	CALR	4090	4059	4089.99	4075.73
CALR_A_573	CALR	4090	4059	4089.99	4075.73
CALR_S_385	CALR	4042	4047	4041.99	4063.68
CALR_S_425	CALR	4012	4039	4011.99	4055.65
CALR_A_265	CALR	3953	3929	3952.99	3945.19
CALR_A_213	CALR	3927	3851	3926.99	3866.87
CALR_A_62	CALR	3886	3878	3885.99	3893.98
CALR_A_110	CALR	3803	3796	3802.99	3811.65
CALR_A_300	CALR	3795	3804	3794.99	3819.68
CALR_A_281	CALR	3765	3730	3764.99	3745.37
CALR_A_572	CALR	3686	3752	3685.99	3767.46
CALR_S_58	CALR	3667	3666	3666.99	3681.11
CALR_A_336	CALR	3648	3619	3647.99	3633.92
CALR_A_376	CALR	3633	3629	3632.99	3643.96
CALR_S_620	CALR	3558	3584	3557.99	3598.77
CALR_S_432	CALR	3577	3555	3576.99	3569.65
CALR_A_539	CALR	3573	3559	3572.99	3573.67
CALR_S_392	CALR	3554	3577	3553.99	3591.74
CALR_A_369	CALR	3547	3529	3546.99	3543.55
CALR_A_498	CALR	3568	3501	3567.99	3515.43
CALR_S_638	CALR	3541	3471	3540.99	3485.31
CALR_A_167	CALR	3541	3471	3540.99	3485.31
CALR_S_461	CALR	3445	3449	3444.99	3463.22
CALR_S_387	CALR	3444	3395	3443.99	3408.99
CALR_S_288	CALR	3404	3408	3403.99	3422.05
CALR_A_531	CALR	3435	3375	3434.99	3388.91
CALR_S_696	CALR	3399	3401	3398.99	3415.02
CALR_A_512	CALR	3398	3390	3397.99	3403.97
CALR_A_133	CALR	3347	3363	3346.99	3376.86
CALR_A_371	CALR	3341	3288	3340.99	3301.55
CALR_S_247	CALR	3315	3300	3314.99	3313.6
CALR_S_496	CALR	3275	3254	3274.99	3267.41
CALR_S_145	CALR	3275	3199	3274.99	3212.18
CALR_S_790	CALR	3209	3197	3208.99	3210.18
CALR_A_685	CALR	3179	3201	3178.99	3214.19
CALR_S_38	CALR	3221	3151	3220.99	3163.99
CALR_A_665	CALR	3221	3151	3220.99	3163.99
CALR_A_195	CALR	3196	3174	3195.99	3187.08
CALR_A_7	CALR	3185	3178	3184.99	3191.1
CALR_A_132	CALR	3126	3103	3125.99	3115.79
CALR_S_200	CALR	3137	3065	3136.99	3077.63
CALR_S_622	CALR	3054	3074	3053.99	3086.67
CALR_A_320	CALR	3056	3062	3055.99	3074.62
CALR_A_556	CALR	3064	3053	3063.99	3065.58
CALR_A_574	CALR	2983	2955	2982.99	2967.18
CALR_S_229	CALR	2954	2918	2953.99	2930.03
CALR_A_212	CALR	2891	2892	2890.99	2903.92
CALR_S_103	CALR	2882	2883	2881.99	2894.88
CALR_S_287	CALR	2881	2879	2880.99	2890.87
CALR_A_262	CALR	2861	2857	2860.99	2868.78
CALR_A_705	CALR	2847	2829	2846.99	2840.66
CALR_S_289	CALR	2835	2820	2834.99	2831.62
CALR_A_596	CALR	2850	2801	2849.99	2812.54
CALR_A_221	CALR	2800	2797	2799.99	2808.53
CALR_A_129	CALR	2774	2756	2773.99	2767.36
CALR_S_623	CALR	2721	2761	2720.99	2772.38
CALR_S_571	CALR	2735	2706	2734.99	2717.15
CALR_A_580	CALR	2740	2684	2739.99	2695.06
CALR_S_143	CALR	2740	2684	2739.99	2695.06
CALR_A_532	CALR	2722	2681	2721.99	2692.05
CALR_S_611	CALR	2638	2588	2637.99	2598.67
CALR_A_217	CALR	2630	2594	2629.99	2604.69
CALR_S_615	CALR	2562	2571	2562	2581.6
CALR_S_406	CALR	2557	2523	2557	2533.4
CALR_S_760	CALR	2536	2518	2536	2528.38
CALR_S_833	CALR	2540	2510	2540	2520.35
CALR_A_227	CALR	2516	2533	2516	2543.44
CALR_S_402	CALR	2515	2531	2515	2541.43
CALR_A_614	CALR	2514	2497	2514	2507.29
CALR_S_731	CALR	2478	2463	2478	2473.15
CALR_S_592	CALR	2472	2450	2472	2460.1
CALR_A_146	CALR	2408	2414	2408	2423.95
CALR_S_666	CALR	2386	2397	2386	2406.88
CALR_S_497	CALR	2388	2385	2388	2394.83
CALR_A_542	CALR	2357	2344	2357	2353.66
CALR_S_164	CALR	2364	2331	2364	2340.61
CALR_S_431	CALR	2361	2331	2361	2340.61
CALR_A_163	CALR	2363	2328	2363	2337.6
CALR_S_22	CALR	2310	2285	2310	2294.42
CALR_A_92	CALR	2304	2281	2304	2290.4
CALR_A_334	CALR	2291	2257	2291	2266.3
CALR_S_763	CALR	2259	2256	2259	2265.3
CALR_S_16	CALR	2256	2254	2256	2263.29
CALR_A_234	CALR	2236	2196	2236	2205.05
CALR_A_461	CALR	2201	2209	2201	2218.1
CALR_S_898	CALR	2202	2181	2202	2189.99
CALR_S_428	CALR	2175	2172	2175	2180.95
CALR_S_422	CALR	2157	2171	2157	2179.95
CALR_S_202	CALR	2152	2119	2152	2127.73
CALR_S_698	CALR	2130	2121	2130	2129.74
CALR_A_591	CALR	2106	2101	2106	2109.66
CALR_A_76	CALR	2099	2090	2099	2098.61
CALR_S_5	CALR	2105	2083	2105	2091.59
CALR_A_149	CALR	2044	2037	2044	2045.4
CALR_S_772	CALR	2020	1987	2020	1995.19
CALR_A_189	CALR	1944	1960	1944	1968.08
CALR_A_99	CALR	1952	1950	1952	1958.04
CALR_A_439	CALR	1936	1926	1936	1933.94
CALR_A_50	CALR	1899	1916	1899	1923.9
CALR_A_241	CALR	1907	1888	1907	1895.78
CALR_S_852	CALR	1827	1825	1827	1832.52
CALR_A_220	CALR	1818	1825	1818	1832.52
CALR_S_4	CALR	1827	1797	1827	1804.41
CALR_S_724	CALR	1811	1809	1811	1816.46
CALR_S_758	CALR	1816	1797	1816	1804.41
CALR_A_625	CALR	1808	1763	1808	1770.27
CALR_S_570	CALR	1775	1784	1775	1791.35
CALR_A_200	CALR	1760	1758	1760	1765.25
CALR_S_35	CALR	1725	1717	1725	1724.08
CALR_A_491	CALR	1739	1696	1739	1702.99
CALR_S_457	CALR	1717	1703	1717	1710.02
CALR_A_489	CALR	1698	1709	1698	1716.04
CALR_S_374	CALR	1919	1469	1919	1475.05
CALR_A_682	CALR	1708	1666	1708	1672.87
CALR_A_185	CALR	1614	1654	1614	1660.82
CALR_S_673	CALR	1610	1608	1610	1614.63
CALR_S_905	CALR	1592	1620	1592	1626.68
CALR_S_817	CALR	1606	1596	1606	1602.58
CALR_S_159	CALR	1581	1580	1581	1586.51
CALR_S_27	CALR	1575	1575	1575	1581.49
CALR_S_754	CALR	1571	1571	1571	1577.48
CALR_A_79	CALR	1571	1571	1571	1577.48
CALR_S_730	CALR	1565	1562	1565	1568.44
CALR_S_209	CALR	1548	1527	1548	1533.29
CALR_S_745	CALR	1527	1519	1527	1525.26
CALR_S_511	CALR	1525	1518	1525	1524.26
CALR_S_393	CALR	1510	1515	1510	1521.24
CALR_S_781	CALR	1507	1517	1507	1523.25
CALR_S_809	CALR	1532	1487	1532	1493.13
CALR_S_97	CALR	1508	1510	1508	1516.22
CALR_A_314	CALR	1504	1499	1504	1505.18
CALR_S_863	CALR	1496	1488	1496	1494.13
CALR_S_430	CALR	1472	1491	1472	1497.15
CALR_S_189	CALR	1474	1485	1474	1491.12
CALR_A_247	CALR	1484	1474	1484	1480.08
CALR_S_471	CALR	1461	1472	1461	1478.07
CALR_S_642	CALR	1442	1482	1442	1488.11
CALR_A_34	CALR	1459	1451	1459	1456.98
CALR_S_742	CALR	1465	1443	1465	1448.95
CALR_S_378	CALR	1461	1442	1461	1447.94
CALR_A_467	CALR	1442	1446	1442	1451.96
CALR_S_52	CALR	1439	1438	1439	1443.93
CALR_S_584	CALR	1434	1423	1434	1428.87
CALR_S_105	CALR	1419	1417	1419	1422.84
CALR_S_465	CALR	1375	1410	1375	1415.81
CALR_S_857	CALR	1395	1387	1395	1392.72
CALR_S_264	CALR	1395	1386	1395	1391.71
ntc_60_89_p	ntc	1382	1395	1382	1400.75
CALR_S_780	CALR	1366	1383	1366	1388.7
CALR_S_786	CALR	1367	1374	1367	1379.66
CALR_A_360	CALR	1371	1354	1371	1359.58
CALR_S_71	CALR	1367	1354	1367	1359.58
CALR_S_261	CALR	1353	1356	1353	1361.59
CALR_A_451	CALR	1360	1346	1360	1351.55
CALR_S_459	CALR	1345	1357	1345	1362.59
CALR_A_678	CALR	1360	1340	1360	1345.52
CALR_S_104	CALR	1321	1318	1321	1323.43
ntc_50_79_m	ntc	1298	1322	1298	1327.45
CALR_S_452	CALR	1308	1311	1308	1316.4
CALR_S_415	CALR	1284	1285	1284	1290.3
CALR_S_841	CALR	1277	1285	1277	1290.3
CALR_S_74	CALR	1267	1268	1267	1273.23
CALR_S_499	CALR	1275	1253	1275	1258.16
CALR_S_161	CALR	1258	1257	1258	1262.18
CALR_A_522	CALR	1269	1244	1269	1249.13
CALR_A_250	CALR	1253	1244	1253	1249.13
CALR_A_652	CALR	1255	1229	1255	1234.07
CALR_S_481	CALR	1238	1231	1238	1236.07
CALR_S_854	CALR	1227	1232	1227	1237.08
CALR_A_206	CALR	1211	1197	1211	1201.93
CALR_S_216	CALR	1208	1186	1208	1190.89
CALR_S_225	CALR	1193	1188	1193	1192.9
CALR_S_224	CALR	1185	1195	1185	1199.93
CALR_S_152	CALR	1189	1191	1189	1195.91
CALR_S_417	CALR	1187	1189	1187	1193.9
CALR_S_416	CALR	1186	1188	1186	1192.9
CALR_S_535	CALR	1184	1175	1184	1179.84
CALR_S_768	CALR	1185	1170	1185	1174.82
CALR_S_446	CALR	1170	1160	1170	1164.78
CALR_A_74	CALR	1147	1161	1147	1165.79
CALR_S_686	CALR	1149	1151	1149	1155.74
CALR_A_638	CALR	1149	1144	1149	1148.72
CALR_A_506	CALR	1152	1138	1152	1142.69
CALR_S_208	CALR	1119	1096	1119	1100.52
CALR_S_595	CALR	1096	1094	1096	1098.51
CALR_A_702	CALR	1095	1092	1095	1096.5
CALR_A_414	CALR	1094	1088	1094	1092.48
CALR_S_271	CALR	1091	1084	1091	1088.47
CALR_A_274	CALR	1094	1075	1094	1079.43
CALR_S_900	CALR	1090	1075	1090	1079.43
CALR_S_51	CALR	1070	1074	1070	1078.43
CALR_A_675	CALR	1076	1058	1076	1062.36
CALR_S_375	CALR	1095	1032	1095	1036.25
CALR_A_449	CALR	1032	1031	1032	1035.25
CALR_S_643	CALR	991	1036	990.998	1040.27
CALR_A_251	CALR	1026	985	1026	989.06
CALR_S_180	CALR	1008	1002	1008	1006.13
CALR_S_405	CALR	1013	994	1013	998.097
CALR_A_664	CALR	1007	984	1007	988.056
CALR_A_253	CALR	1016	971	1016	975.002
CALR_A_329	CALR	977	985	976.998	989.06
CALR_A_275	CALR	970	965	969.998	968.977
CALR_A_706	CALR	962	952	961.998	955.924
CALR_A_447	CALR	956	951	955.998	954.92
CALR_S_787	CALR	948	939	947.998	942.87
CALR_S_500	CALR	938	938	937.998	941.866
CALR_A_246	CALR	926	924	925.998	927.808
CALR_A_707	CALR	914	910	913.998	913.751
CALR_A_404	CALR	894	912	893.998	915.759
CALR_A_600	CALR	897	904	896.998	907.726
CALR_S_675	CALR	903	892	902.998	895.676
CALR_S_427	CALR	868	915	867.998	918.771
CALR_S_204	CALR	895	885	894.998	888.648
CALR_S_410	CALR	895	873	894.998	876.598
CALR_A_347	CALR	895	873	894.998	876.598
CALR_A_488	CALR	869	886	868.998	889.652
CALR_S_775	CALR	876	872	875.998	875.594
CALR_A_36	CALR	860	864	859.998	867.561
CALR_A_659	CALR	864	858	863.998	861.536
CALR_S_503	CALR	861	859	860.998	862.54
CALR_A_193	CALR	860	852	859.998	855.512
CALR_S_203	CALR	857	852	856.998	855.512
CALR_S_593	CALR	860	842	859.998	845.47
CALR_S_491	CALR	848	847	847.998	850.491
CALR_S_398	CALR	839	842	838.998	845.47
CALR_S_178	CALR	826	838	825.998	841.454
CALR_A_549	CALR	826	838	825.998	841.454
CALR_S_118	CALR	836	827	835.998	830.409
CALR_A_694	CALR	833	819	832.998	822.376
CALR_A_44	CALR	818	823	817.998	826.392
CALR_S_188	CALR	816	779	815.998	782.211
CALR_S_100	CALR	792	795	791.998	798.277
CALR_A_507	CALR	781	768	780.998	771.165
CALR_A_188	CALR	776	770	775.998	773.174
CALR_A_440	CALR	765	752	764.999	755.099
CALR_S_509	CALR	761	750	760.999	753.091
CALR_A_202	CALR	738	744	737.999	747.066
CALR_A_441	CALR	735	729	734.999	732.005
CALR_S_101	CALR	722	726	721.999	728.992
CALR_S_632	CALR	701	708	700.999	710.918
CALR_S_142	CALR	707	693	706.999	695.856
CALR_S_647	CALR	690	686	689.999	688.827
CALR_S_524	CALR	689	687	688.999	689.832
CALR_S_480	CALR	676	679	675.999	681.799
CALR_S_211	CALR	672	663	671.999	665.733
CALR_A_606	CALR	658	665	657.999	667.741
CALR_A_156	CALR	660	658	659.999	660.712
CALR_A_298	CALR	652	641	651.999	643.642
CALR_S_861	CALR	630	634	629.999	636.613
CALR_S_243	CALR	624	616	623.999	618.539
CALR_A_469	CALR	619	619	618.999	621.551
CALR_A_296	CALR	616	619	615.999	621.551
CALR_A_68	CALR	609	614	608.999	616.531
CALR_A_562	CALR	608	605	607.999	607.494
CALR_S_521	CALR	601	608	600.999	610.506
CALR_S_86	CALR	607	599	606.999	601.469
CALR_S_839	CALR	609	593	608.999	595.444
CALR_S_85	CALR	597	599	596.999	601.469
CALR_S_29	CALR	599	596	598.999	598.456
CALR_S_561	CALR	593	591	592.999	593.436
CALR_S_273	CALR	588	593	587.999	595.444
CALR_S_195	CALR	583	581	582.999	583.395
CALR_S_171	CALR	582	580	581.999	582.391
ntc_49_78_m	ntc	566	564	565.999	566.325
CALR_A_142	CALR	551	548	550.999	550.259
CALR_A_610	CALR	539	535	538.999	537.205
CALR_S_875	CALR	538	535	537.999	537.205
CALR_S_565	CALR	534	537	533.999	539.213
CALR_A_285	CALR	534	531	533.999	533.189
CALR_S_493	CALR	534	531	533.999	533.189
CALR_S_847	CALR	525	528	524.999	530.176
CALR_A_207	CALR	528	524	527.999	526.16
CALR_S_242	CALR	525	526	524.999	528.168
CALR_S_740	CALR	526	524	525.999	526.16
CALR_A_398	CALR	517	523	516.999	525.156
CALR_S_871	CALR	507	525	506.999	527.164
CALR_S_182	CALR	512	512	511.999	514.11
CALR_A_500	CALR	508	506	507.999	508.086
CALR_S_213	CALR	504	507	503.999	509.09
CALR_A_566	CALR	500	502	499.999	504.069
CALR_A_551	CALR	496	499	495.999	501.057
CALR_A_701	CALR	490	491	489.999	493.024
CALR_A_66	CALR	487	485	486.999	486.999
ntc_4_33_m	ntc	488	480	487.999	481.978
CALR_S_630	CALR	487	479	486.999	480.974
CALR_S_850	CALR	475	456	474.999	457.879
CALR_S_580	CALR	465	460	464.999	461.896
CALR_A_218	CALR	465	460	464.999	461.896
CALR_A_363	CALR	461	457	460.999	458.884
CALR_A_455	CALR	438	438	437.999	439.805
CALR_S_99	CALR	412	417	411.999	418.719
CALR_S_18	CALR	413	400	412.999	401.649
CALR_A_60	CALR	405	407	404.999	408.677
CALR_A_184	CALR	385	413	384.999	414.702
CALR_S_523	CALR	394	394	393.999	395.624
CALR_S_42	CALR	380	375	379.999	376.546
CALR_S_412	CALR	377	375	376.999	376.546
CALR_S_198	CALR	369	370	368.999	371.525
CALR_A_605	CALR	357	365	356.999	366.504
CALR_A_680	CALR	361	357	360.999	358.471
CALR_S_609	CALR	359	351	358.999	352.447
CALR_A_650	CALR	348	351	347.999	352.447
CALR_S_536	CALR	349	350	348.999	351.443
CALR_S_172	CALR	350	348	349.999	349.434
CALR_A_454	CALR	347	347	346.999	348.43
CALR_S_212	CALR	335	336	334.999	337.385
CALR_S_464	CALR	336	333	335.999	334.372
CALR_S_548	CALR	334	334	333.999	335.377
CALR_A_708	CALR	324	321	323.999	322.323
CALR_A_674	CALR	315	317	314.999	318.307
CALR_A_313	CALR	316	316	315.999	317.302
CALR_S_825	CALR	307	302	306.999	303.245
ntc_35_64_m	ntc	304	299	303.999	300.232
CALR_S_154	CALR	300	301	299.999	302.241
CALR_S_837	CALR	286	292	285.999	293.204
ntc_46_75_p	ntc	293	284	292.999	285.171
CALR_S_90	CALR	288	285	287.999	286.175
CALR_S_283	CALR	285	284	284.999	285.171
CALR_A_497	CALR	278	272	277.999	273.121
CALR_S_197	CALR	269	271	268.999	272.117
CALR_S_873	CALR	263	271	262.999	272.117
CALR_A_648	CALR	260	268	259.999	269.105
CALR_A_383	CALR	261	259	260.999	260.067
CALR_S_608	CALR	257	258	257	259.063
CALR_S_631	CALR	255	252	255	253.039
CALR_S_831	CALR	250	250	250	251.03
CALR_S_297	CALR	249	245	249	246.01
CALR_A_139	CALR	243	243	243	244.002
CALR_S_442	CALR	248	238	248	238.981
CALR_S_566	CALR	239	247	239	248.018
CALR_S_793	CALR	242	239	242	239.985
CALR_S_626	CALR	237	239	237	239.985
CALR_S_653	CALR	234	235	234	235.969
CALR_A_201	CALR	229	235	229	235.969
CALR_A_662	CALR	234	228	234	228.94
CALR_A_305	CALR	235	227	235	227.936
CALR_S_286	CALR	230	229	230	229.944
CALR_A_647	CALR	224	232	224	232.956
CALR_A_443	CALR	226	225	226	225.927
CALR_A_699	CALR	223	217	223	217.894
CALR_S_370	CALR	237	201	237	201.828
CALR_S_702	CALR	209	214	209	214.882
CALR_S_196	CALR	206	207	206	207.853
CALR_S_752	CALR	203	204	203	204.841
CALR_A_452	CALR	203	202	203	202.833
CALR_S_560	CALR	198	197	198	197.812
CALR_S_322	CALR	186	183	186	183.754
CALR_A_286	CALR	181	177	181	177.73
CALR_A_627	CALR	178	174	178	174.717
CALR_S_835	CALR	175	177	175	177.73
CALR_S_645	CALR	172	172	172	172.709
CALR_S_628	CALR	170	174	170	174.717
CALR_S_729	CALR	168	172	168	172.709
CALR_S_694	CALR	166	165	166	165.68
CALR_S_175	CALR	159	163	159	163.672
CALR_S_543	CALR	153	157	153	157.647
CALR_S_743	CALR	150	155	150	155.639
CALR_S_117	CALR	144	144	144	144.594
CALR_S_40	CALR	141	144	141	144.594
CALR_S_556	CALR	145	139	145	139.573
CALR_S_779	CALR	137	146	137	146.602
ntc_22_51_p	ntc	142	139	142	139.573
CALR_S_321	CALR	144	136	144	136.561
CALR_S_25	CALR	137	141	137	141.581
CALR_A_183	CALR	136	136	136	136.561
CALR_S_174	CALR	132	132	132	132.544
CALR_S_168	CALR	131	130	131	130.536
CALR_S_454	CALR	126	129	126	129.532
CALR_A_584	CALR	127	124	127	124.511
ntc_43_72_p	ntc	101	102	101	102.42
CALR_S_865	CALR	99	99	98.9998	99.408
CALR_S_260	CALR	96	96	95.9998	96.3957
CALR_S_705	CALR	96	94	95.9998	94.3874
CALR_A_392	CALR	91	85	90.9998	85.3503
CALR_A_55	CALR	88	85	87.9998	85.3503
CALR_S_62	CALR	80	79	79.9998	79.3256
CALR_S_794	CALR	78	79	77.9998	79.3256
CALR_A_399	CALR	77	79	76.9999	79.3256
CALR_A_87	CALR	75	69	74.9999	69.2844
CALR_S_868	CALR	66	68	65.9999	68.2803
CALR_A_429	CALR	66	67	65.9999	67.2761
CALR_S_278	CALR	63	64	62.9999	64.2638
CALR_S_796	CALR	62	64	61.9999	64.2638
CALR_A_88	CALR	63	61	62.9999	61.2514
CALR_S_419	CALR	59	59	58.9999	59.2432
CALR_A_257	CALR	57	56	56.9999	56.2308
CALR_S_784	CALR	53	52	52.9999	52.2143
CALR_A_514	CALR	51	51	50.9999	51.2102
CALR_A_97	CALR	42	42	41.9999	42.1731
CALR_S_259	CALR	39	39	38.9999	39.1607
CALR_S_682	CALR	39	39	38.9999	39.1607
CALR_S_232	CALR	31	32	30.9999	32.1319
CALR_S_706	CALR	21	22	21	22.0907
CALR_A_364	CALR	20	20	20	20.0824
CALR_A_691	CALR	19	19	19	19.0783
ntc_19_48_p	ntc	18	18	18	18.0742
CALR_S_54	CALR	15	14	15	14.0577
CALR_S_747	CALR	14	15	14	15.0618
ntc_466_495_m	ntc	12	13	12	13.0536
ntc_279_308_p	ntc	11	10	11	10.0412
ntc_161_190_p	ntc	8	7	7.99998	7.02885
ntc_168_197_m	ntc	8	7	7.99998	7.02885
ntc_256_285_p	ntc	7	7	6.99999	7.02885
ntc_179_208_p	ntc	6	6	5.99999	6.02473
ntc_307_336_m	ntc	6	6	5.99999	6.02473
ntc_280_309_p	ntc	6	6	5.99999	6.02473
ntc_465_494_m	ntc	6	6	5.99999	6.02473
ntc_257_286_p	ntc	6	6	5.99999	6.02473
ntc_107_136_m	ntc	6	5	5.99999	5.02061
CALR_A_577	CALR	6	4	5.99999	4.01649
ntc_227_256_p	ntc	5	5	4.99999	5.02061
ntc_393_422_m	ntc	4	5	3.99999	5.02061
ntc_234_263_p	ntc	4	5	3.99999	5.02061
ntc_268_297_p	ntc	4	4	3.99999	4.01649
ntc_133_162_m	ntc	4	4	3.99999	4.01649
ntc_367_396_p	ntc	4	3	3.99999	3.01236
ntc_106_135_m	ntc	4	3	3.99999	3.01236
ntc_101_130_m	ntc	3	4	2.99999	4.01649
CALR_A_96	CALR	3	3	2.99999	3.01236
ntc_132_161_m	ntc	3	3	2.99999	3.01236
ntc_325_354_m	ntc	3	3	2.99999	3.01236
ntc_358_387_p	ntc	2	3	2	3.01236
ntc_160_189_p	ntc	3	2	2.99999	2.00824
ntc_224_253_m	ntc	2	3	2	3.01236
ntc_383_412_m	ntc	2	3	2	3.01236
ntc_382_411_m	ntc	2	3	2	3.01236
ntc_408_437_p	ntc	2	2	2	2.00824
ntc_394_423_m	ntc	2	2	2	2.00824
ntc_458_487_m	ntc	2	2	2	2.00824
ntc_398_427_p	ntc	2	2	2	2.00824
ntc_299_328_m	ntc	2	2	2	2.00824
ntc_404_433_m	ntc	2	2	2	2.00824
ntc_248_277_p	ntc	2	2	2	2.00824
ntc_403_432_m	ntc	2	2	2	2.00824
ntc_92_121_p	ntc	2	2	2	2.00824
ntc_255_284_p	ntc	2	2	2	2.00824
ntc_368_397_p	ntc	2	1	2	1.00412
ntc_254_283_p	ntc	2	1	2	1.00412
ntc_2009_2038_p	ntc	1	2	0.999998	2.00824
ntc_269_298_p	ntc	1	1	0.999998	1.00412
ntc_138_167_m	ntc	1	1	0.999998	1.00412
ntc_364_393_m	ntc	1	1	0.999998	1.00412
ntc_351_380_m	ntc	1	1	0.999998	1.00412
ntc_353_382_p	ntc	1	1	0.999998	1.00412
ntc_334_363_p	ntc	1	1	0.999998	1.00412
ntc_247_276_p	ntc	1	1	0.999998	1.00412
CALR_S_547	CALR	1	1	0.999998	1.00412
ntc_307_336_p	ntc	1	1	0.999998	1.00412
ntc_100_129_m	ntc	1	1	0.999998	1.00412
ntc_378_407_p	ntc	1	0	0.999998	0
CALR_A_288	CALR	0	0	0	0
CALR_A_338	CALR	0	0	0	0
CALR_A_428	CALR	0	0	0	0
ntc_237_266_p	ntc	0	0	0	0
ntc_306_335_m	ntc	0	0	0	0
ntc_348_377_p	ntc	0	0	0	0
ntc_384_413_m	ntc	0	0	0	0
