# Supplementary material for: CRISPR-Cas9-Mediated Cytosine Base Editing Screen for the Functional Assessment of CALR Intron Variants in Japanese Encephalitis Virus Replication
Source: Int J Mol Sci. 2023 Aug 28;24(17):13331. doi: 10.3390/ijms241713331 (PMC10487596; doi:10.3390/ijms241713331)
Supplement: Supplementary file 1 [file ijms-24-13331-s001.zip › Supplementary Table S3_Deep_sequencing_mutant_cell_librry.xls]

## Sheet: 25_result
sgRNA	gene	sample1	sample2	sample1	sample2
CALR_S_139	CALR	504	525	533.075	522.5
CALR_A_158	CALR	353	329	373.364	327.433
CALR_S_587	CALR	326	322	344.807	320.467
CALR_S_73	CALR	290	317	306.73	315.491
CALR_S_726	CALR	281	297	297.211	295.586
CALR_A_134	CALR	273	299	288.749	297.576
CALR_S_408	CALR	285	287	301.441	285.633
CALR_S_293	CALR	224	240	236.922	238.857
CALR_A_293	CALR	233	231	246.442	229.9
CALR_A_159	CALR	217	208	229.519	207.01
CALR_S_572	CALR	208	212	219.999	210.991
CALR_A_517	CALR	188	231	198.846	229.9
CALR_A_456	CALR	198	216	209.422	214.971
CALR_S_67	CALR	159	213	168.173	211.986
CALR_A_4	CALR	167	201	176.634	200.043
CALR_S_501	CALR	175	185	185.096	184.119
CALR_A_215	CALR	175	180	185.096	179.143
ntc_61_90_m	ntc	159	190	168.173	189.095
CALR_S_382	CALR	177	169	187.211	168.195
CALR_S_392	CALR	162	184	171.346	183.124
CALR_S_407	CALR	161	178	170.288	177.152
CALR_A_237	CALR	166	164	175.576	163.219
CALR_S_57	CALR	171	158	180.865	157.248
CALR_A_530	CALR	150	179	158.653	178.148
CALR_A_620	CALR	173	153	182.98	152.271
CALR_A_692	CALR	165	157	174.519	156.252
CALR_A_47	CALR	162	158	171.346	157.248
CALR_S_637	CALR	153	166	161.826	165.21
CALR_S_3	CALR	152	162	160.769	161.229
CALR_A_378	CALR	155	148	163.942	147.295
CALR_A_133	CALR	146	147	154.423	146.3
CALR_A_166	CALR	149	140	157.596	139.333
CALR_S_81	CALR	136	134	143.846	133.362
CALR_A_265	CALR	127	143	134.327	142.319
CALR_S_191	CALR	129	136	136.442	135.352
CALR_A_590	CALR	142	112	150.192	111.467
CALR_S_696	CALR	124	125	131.153	124.405
CALR_A_32	CALR	130	116	137.5	115.448
CALR_A_336	CALR	120	121	126.923	120.424
CALR_S_579	CALR	127	110	134.327	109.476
CALR_S_497	CALR	114	117	120.577	116.443
CALR_S_215	CALR	107	121	113.173	120.424
CALR_A_521	CALR	107	121	113.173	120.424
CALR_S_496	CALR	105	123	111.057	122.414
CALR_A_574	CALR	109	119	115.288	118.433
CALR_S_425	CALR	101	125	106.827	124.405
CALR_A_238	CALR	115	110	121.634	109.476
CALR_A_573	CALR	103	122	108.942	121.419
CALR_S_149	CALR	103	122	108.942	121.419
CALR_A_167	CALR	105	118	111.057	117.438
CALR_S_638	CALR	105	118	111.057	117.438
CALR_A_279	CALR	110	110	116.346	109.476
CALR_S_620	CALR	107	112	113.173	111.467
CALR_A_173	CALR	111	107	117.404	106.49
CALR_S_619	CALR	111	107	117.404	106.49
CALR_S_252	CALR	107	109	113.173	108.481
CALR_A_243	CALR	94	121	99.4228	120.424
CALR_S_380	CALR	104	103	110	102.51
CALR_S_896	CALR	106	101	112.115	100.519
CALR_S_200	CALR	103	100	108.942	99.5238
CALR_A_491	CALR	99	102	104.711	101.514
CALR_A_2	CALR	94	105	99.4228	104.5
CALR_S_58	CALR	110	84	116.346	83.6
CALR_S_78	CALR	93	100	98.3651	99.5238
CALR_A_619	CALR	93	100	98.3651	99.5238
CALR_S_143	CALR	91	101	96.2497	100.519
CALR_A_580	CALR	91	101	96.2497	100.519
CALR_S_288	CALR	94	96	99.4228	95.5429
CALR_S_613	CALR	86	98	90.9613	97.5334
CALR_S_434	CALR	97	84	102.596	83.6
CALR_A_110	CALR	79	98	83.5575	97.5334
CALR_A_227	CALR	84	89	88.8459	88.5762
CALR_S_789	CALR	73	94	77.2113	93.5524
CALR_A_50	CALR	88	79	93.0767	78.6238
CALR_A_447	CALR	83	83	87.7882	82.6048
CALR_A_62	CALR	86	79	90.9613	78.6238
CALR_S_541	CALR	79	86	83.5575	85.5905
CALR_S_120	CALR	81	83	85.6728	82.6048
CALR_A_300	CALR	75	88	79.3267	87.581
CALR_A_320	CALR	81	81	85.6728	80.6143
CALR_S_262	CALR	68	92	71.9229	91.5619
CALR_A_622	CALR	71	87	75.0959	86.5857
CALR_A_281	CALR	81	76	85.6728	75.6381
CALR_A_461	CALR	77	79	81.4421	78.6238
CALR_A_522	CALR	78	78	82.4998	77.6286
CALR_A_217	CALR	73	83	77.2113	82.6048
CALR_A_531	CALR	80	74	84.6152	73.6476
CALR_A_512	CALR	77	77	81.4421	76.6333
CALR_S_854	CALR	73	79	77.2113	78.6238
CALR_S_145	CALR	68	82	71.9229	81.6095
CALR_S_385	CALR	72	76	76.1536	75.6381
CALR_S_731	CALR	83	65	87.7882	64.6905
CALR_A_705	CALR	72	75	76.1536	74.6429
CALR_S_229	CALR	78	68	82.4998	67.6762
CALR_A_368	CALR	65	80	68.7498	79.6191
CALR_A_376	CALR	61	82	64.5191	81.6095
CALR_A_76	CALR	60	77	63.4614	76.6333
CALR_S_724	CALR	70	67	74.0383	66.681
CALR_A_213	CALR	68	69	71.9229	68.6714
CALR_S_432	CALR	78	57	82.4998	56.7286
CALR_A_498	CALR	53	82	56.0575	81.6095
CALR_S_289	CALR	62	70	65.5767	69.6667
CALR_S_622	CALR	58	73	61.346	72.6524
CALR_S_287	CALR	69	62	72.9806	61.7048
CALR_A_200	CALR	62	68	65.5767	67.6762
CALR_S_216	CALR	61	68	64.5191	67.6762
CALR_S_790	CALR	55	74	58.1729	73.6476
CALR_S_164	CALR	61	66	64.5191	65.6857
CALR_S_499	CALR	64	63	67.6921	62.7
CALR_A_371	CALR	61	64	64.5191	63.6953
CALR_A_250	CALR	58	65	61.346	64.6905
CALR_S_535	CALR	58	65	61.346	64.6905
CALR_A_262	CALR	57	65	60.2883	64.6905
CALR_A_539	CALR	56	65	59.2306	64.6905
CALR_A_129	CALR	61	57	64.5191	56.7286
CALR_A_631	CALR	65	53	68.7498	52.7476
CALR_A_572	CALR	66	49	69.8075	48.7667
CALR_S_264	CALR	59	56	62.4037	55.7333
CALR_S_905	CALR	58	56	61.346	55.7333
CALR_A_532	CALR	62	51	65.5767	50.7572
CALR_S_758	CALR	54	58	57.1152	57.7238
CALR_S_415	CALR	49	61	51.8268	60.7095
CALR_S_416	CALR	49	61	51.8268	60.7095
CALR_S_417	CALR	49	61	51.8268	60.7095
CALR_S_103	CALR	49	61	51.8268	60.7095
CALR_A_695	CALR	42	67	44.423	66.681
CALR_S_686	CALR	61	48	64.5191	47.7714
CALR_S_471	CALR	58	50	61.346	49.7619
CALR_S_242	CALR	52	55	54.9998	54.7381
CALR_S_406	CALR	55	52	58.1729	51.7524
CALR_A_614	CALR	52	54	54.9998	53.7429
CALR_S_615	CALR	55	49	58.1729	48.7667
CALR_S_623	CALR	48	56	50.7691	55.7333
CALR_S_772	CALR	63	40	66.6344	39.8095
CALR_S_243	CALR	56	47	59.2306	46.7762
CALR_A_185	CALR	51	52	53.9422	51.7524
CALR_S_209	CALR	46	55	48.6537	54.7381
CALR_S_817	CALR	60	41	63.4614	40.8048
CALR_A_234	CALR	49	51	51.8268	50.7572
CALR_S_763	CALR	51	47	53.9422	46.7762
CALR_S_118	CALR	49	45	51.8268	44.7857
CALR_A_241	CALR	43	49	45.4806	48.7667
CALR_S_195	CALR	42	50	44.423	49.7619
CALR_A_665	CALR	43	46	45.4806	45.781
CALR_S_38	CALR	43	46	45.4806	45.781
CALR_A_34	CALR	44	45	46.5383	44.7857
CALR_S_387	CALR	43	46	45.4806	45.781
CALR_A_246	CALR	39	49	41.2499	48.7667
CALR_S_422	CALR	42	45	44.423	44.7857
CALR_A_149	CALR	39	48	41.2499	47.7714
CALR_A_591	CALR	34	53	35.9614	52.7476
CALR_A_112	CALR	50	36	52.8845	35.8286
CALR_A_195	CALR	41	44	43.3653	43.7905
CALR_A_404	CALR	37	48	39.1345	47.7714
CALR_S_202	CALR	47	37	49.7114	36.8238
CALR_A_132	CALR	44	40	46.5383	39.8095
CALR_A_439	CALR	35	49	37.0191	48.7667
CALR_A_221	CALR	40	42	42.3076	41.8
CALR_A_706	CALR	45	37	47.596	36.8238
CALR_S_461	CALR	29	53	30.673	52.7476
CALR_S_898	CALR	38	44	40.1922	43.7905
CALR_S_571	CALR	43	38	45.4806	37.8191
CALR_S_428	CALR	36	45	38.0768	44.7857
CALR_S_27	CALR	43	38	45.4806	37.8191
CALR_S_22	CALR	36	45	38.0768	44.7857
CALR_S_180	CALR	31	49	32.7884	48.7667
CALR_A_206	CALR	35	45	37.0191	44.7857
CALR_S_52	CALR	34	45	35.9614	44.7857
CALR_S_742	CALR	36	40	38.0768	39.8095
CALR_S_907	CALR	38	36	40.1922	35.8286
CALR_A_220	CALR	38	36	40.1922	35.8286
CALR_S_906	CALR	37	35	39.1345	34.8333
CALR_A_678	CALR	35	37	37.0191	36.8238
CALR_S_204	CALR	41	31	43.3653	30.8524
CALR_A_212	CALR	35	37	37.0191	36.8238
CALR_S_100	CALR	36	35	38.0768	34.8333
CALR_A_414	CALR	37	34	39.1345	33.8381
CALR_S_203	CALR	41	30	43.3653	29.8571
CALR_A_701	CALR	37	32	39.1345	31.8476
CALR_S_570	CALR	35	34	37.0191	33.8381
CALR_A_347	CALR	34	34	35.9614	33.8381
CALR_S_410	CALR	34	34	35.9614	33.8381
CALR_A_253	CALR	30	38	31.7307	37.8191
CALR_S_852	CALR	36	32	38.0768	31.8476
CALR_S_524	CALR	33	35	34.9037	34.8333
CALR_S_775	CALR	30	37	31.7307	36.8238
CALR_S_457	CALR	32	35	33.8461	34.8333
CALR_S_4	CALR	34	32	35.9614	31.8476
CALR_S_5	CALR	34	32	35.9614	31.8476
CALR_A_469	CALR	38	28	40.1922	27.8667
CALR_S_760	CALR	27	38	28.5576	37.8191
CALR_A_685	CALR	22	43	23.2692	42.7952
CALR_A_650	CALR	37	28	39.1345	27.8667
CALR_A_92	CALR	34	30	35.9614	29.8571
CALR_S_13	CALR	34	30	35.9614	29.8571
CALR_A_467	CALR	30	33	31.7307	32.8429
CALR_A_360	CALR	28	34	29.6153	33.8381
CALR_S_459	CALR	34	28	35.9614	27.8667
CALR_A_659	CALR	33	29	34.9037	28.8619
CALR_S_99	CALR	31	30	32.7884	29.8571
CALR_A_652	CALR	28	33	29.6153	32.8429
CALR_A_189	CALR	25	36	26.4422	35.8286
CALR_S_863	CALR	27	32	28.5576	31.8476
CALR_A_74	CALR	20	39	21.1538	38.8143
CALR_S_666	CALR	22	36	23.2692	35.8286
CALR_A_146	CALR	21	36	22.2115	35.8286
CALR_S_430	CALR	38	19	40.1922	18.9095
CALR_S_611	CALR	36	21	38.0768	20.9
CALR_S_225	CALR	25	31	26.4422	30.8524
CALR_A_192	CALR	30	26	31.7307	25.8762
CALR_S_786	CALR	28	26	29.6153	25.8762
CALR_S_787	CALR	28	26	29.6153	25.8762
CALR_A_79	CALR	23	31	24.3269	30.8524
CALR_S_754	CALR	23	31	24.3269	30.8524
CALR_A_600	CALR	31	23	32.7884	22.8905
CALR_S_85	CALR	25	28	26.4422	27.8667
CALR_A_99	CALR	27	26	28.5576	25.8762
CALR_A_207	CALR	27	25	28.5576	24.881
CALR_S_745	CALR	24	28	25.3845	27.8667
CALR_S_511	CALR	27	25	28.5576	24.881
CALR_S_875	CALR	24	28	25.3845	27.8667
CALR_A_625	CALR	23	29	24.3269	28.8619
CALR_S_35	CALR	23	28	24.3269	27.8667
CALR_A_556	CALR	23	28	24.3269	27.8667
CALR_A_184	CALR	29	21	30.673	20.9
CALR_S_850	CALR	23	27	24.3269	26.8714
CALR_S_592	CALR	20	30	21.1538	29.8571
CALR_S_189	CALR	27	22	28.5576	21.8952
CALR_A_694	CALR	22	27	23.2692	26.8714
CALR_A_506	CALR	24	25	25.3845	24.881
CALR_S_402	CALR	22	26	23.2692	25.8762
CALR_S_431	CALR	24	24	25.3845	23.8857
CALR_S_208	CALR	24	23	25.3845	22.8905
CALR_S_62	CALR	19	27	20.0961	26.8714
CALR_A_334	CALR	20	25	21.1538	24.881
CALR_S_374	CALR	19	26	20.0961	25.8762
CALR_A_707	CALR	23	21	24.3269	20.9
CALR_A_708	CALR	23	21	24.3269	20.9
CALR_S_452	CALR	20	24	21.1538	23.8857
CALR_S_74	CALR	16	25	16.923	24.881
CALR_A_251	CALR	18	21	19.0384	20.9
CALR_S_632	CALR	19	20	20.0961	19.9048
CALR_A_247	CALR	16	23	16.923	22.8905
CALR_S_104	CALR	18	20	19.0384	19.9048
CALR_S_105	CALR	18	20	19.0384	19.9048
CALR_S_211	CALR	20	17	21.1538	16.9191
CALR_S_101	CALR	19	18	20.0961	17.9143
CALR_S_698	CALR	23	14	24.3269	13.9333
CALR_A_638	CALR	15	22	15.8653	21.8952
CALR_A_596	CALR	16	21	16.923	20.9
CALR_S_480	CALR	20	16	21.1538	15.9238
CALR_S_161	CALR	11	24	11.6346	23.8857
CALR_A_489	CALR	15	20	15.8653	19.9048
CALR_S_584	CALR	17	18	17.9807	17.9143
CALR_S_378	CALR	15	19	15.8653	18.9095
ntc_4_33_m	ntc	23	11	24.3269	10.9476
CALR_S_159	CALR	15	19	15.8653	18.9095
CALR_S_393	CALR	19	14	20.0961	13.9333
CALR_S_154	CALR	17	16	17.9807	15.9238
CALR_A_163	CALR	13	20	13.75	19.9048
CALR_S_900	CALR	15	18	15.8653	17.9143
CALR_S_780	CALR	12	20	12.6923	19.9048
CALR_S_781	CALR	12	20	12.6923	19.9048
CALR_S_833	CALR	7	25	7.40383	24.881
CALR_S_446	CALR	17	14	17.9807	13.9333
CALR_A_156	CALR	21	10	22.2115	9.95238
CALR_S_481	CALR	12	19	12.6923	18.9095
CALR_S_40	CALR	18	13	19.0384	12.9381
CALR_S_188	CALR	11	20	11.6346	19.9048
CALR_S_521	CALR	17	14	17.9807	13.9333
CALR_S_224	CALR	14	17	14.8077	16.9191
CALR_A_443	CALR	10	21	10.5769	20.9
CALR_S_548	CALR	15	15	15.8653	14.9286
CALR_S_142	CALR	14	16	14.8077	15.9238
CALR_S_273	CALR	11	19	11.6346	18.9095
CALR_A_60	CALR	15	15	15.8653	14.9286
CALR_A_647	CALR	17	12	17.9807	11.9429
CALR_A_605	CALR	11	18	11.6346	17.9143
CALR_A_7	CALR	8	21	8.46152	20.9
CALR_A_507	CALR	12	17	12.6923	16.9191
CALR_S_90	CALR	14	14	14.8077	13.9333
ntc_22_51_p	ntc	14	14	14.8077	13.9333
CALR_A_274	CALR	11	17	11.6346	16.9191
CALR_S_71	CALR	16	12	16.923	11.9429
CALR_A_363	CALR	11	16	11.6346	15.9238
CALR_A_440	CALR	12	15	12.6923	14.9286
CALR_A_441	CALR	12	15	12.6923	14.9286
CALR_A_188	CALR	14	13	14.8077	12.9381
CALR_S_565	CALR	18	8	19.0384	7.96191
CALR_S_566	CALR	18	8	19.0384	7.96191
CALR_S_847	CALR	12	14	12.6923	13.9333
CALR_A_329	CALR	8	18	8.46152	17.9143
CALR_A_451	CALR	16	10	16.923	9.95238
CALR_S_595	CALR	12	13	12.6923	12.9381
CALR_S_182	CALR	12	13	12.6923	12.9381
CALR_A_314	CALR	13	12	13.75	11.9429
CALR_S_261	CALR	13	12	13.75	11.9429
CALR_A_218	CALR	15	10	15.8653	9.95238
CALR_S_580	CALR	15	10	15.8653	9.95238
CALR_A_549	CALR	10	15	10.5769	14.9286
CALR_S_178	CALR	10	15	10.5769	14.9286
CALR_S_500	CALR	12	13	12.6923	12.9381
CALR_S_370	CALR	14	10	14.8077	9.95238
CALR_A_542	CALR	9	15	9.5192	14.9286
CALR_A_369	CALR	8	16	8.46152	15.9238
CALR_S_465	CALR	11	13	11.6346	12.9381
CALR_S_752	CALR	9	15	9.5192	14.9286
CALR_S_793	CALR	12	12	12.6923	11.9429
CALR_S_794	CALR	12	12	12.6923	11.9429
CALR_S_593	CALR	7	17	7.40383	16.9191
CALR_A_455	CALR	9	14	9.5192	13.9333
CALR_S_768	CALR	12	11	12.6923	10.9476
CALR_S_322	CALR	10	13	10.5769	12.9381
CALR_S_841	CALR	9	13	9.5192	12.9381
CALR_S_412	CALR	7	15	7.40383	14.9286
CALR_A_551	CALR	6	16	6.34614	15.9238
CALR_A_275	CALR	9	13	9.5192	12.9381
CALR_S_42	CALR	10	11	10.5769	10.9476
CALR_S_375	CALR	10	11	10.5769	10.9476
CALR_S_247	CALR	11	9	11.6346	8.95714
CALR_S_560	CALR	14	6	14.8077	5.97143
CALR_S_51	CALR	9	11	9.5192	10.9476
CALR_S_16	CALR	8	12	8.46152	11.9429
CALR_A_488	CALR	11	8	11.6346	7.96191
CALR_S_175	CALR	7	12	7.40383	11.9429
CALR_A_675	CALR	12	7	12.6923	6.96667
CALR_A_142	CALR	11	7	11.6346	6.96667
CALR_A_193	CALR	5	12	5.28845	11.9429
CALR_A_298	CALR	10	7	10.5769	6.96667
CALR_S_730	CALR	6	10	6.34614	9.95238
CALR_S_86	CALR	7	9	7.40383	8.95714
CALR_S_491	CALR	5	10	5.28845	9.95238
CALR_S_642	CALR	6	8	6.34614	7.96191
CALR_S_643	CALR	6	8	6.34614	7.96191
CALR_A_44	CALR	9	4	9.5192	3.98095
CALR_S_405	CALR	6	5	6.34614	4.97619
CALR_A_664	CALR	7	3	7.40383	2.98571
CALR_S_873	CALR	5	3	5.28845	2.98571
CALR_S_171	CALR	2	5	2.11538	4.97619
CALR_S_297	CALR	1	4	1.05769	3.98095
CALR_A_691	CALR	0	2	0	1.99048
CALR_S_857	CALR	0	2	0	1.99048
CALR_S_645	CALR	1	0	1.05769	0
CALR_A_285	CALR	0	1	0	0.995238
CALR_A_286	CALR	0	1	0	0.995238
CALR_A_566	CALR	0	1	0	0.995238
CALR_S_493	CALR	0	1	0	0.995238
CALR_S_647	CALR	0	1	0	0.995238
CALR_S_427	CALR	0	1	0	0.995238
CALR_A_139	CALR	0	0	0	0
CALR_A_183	CALR	0	0	0	0
CALR_A_201	CALR	0	0	0	0
CALR_A_202	CALR	0	0	0	0
CALR_A_257	CALR	0	0	0	0
CALR_A_288	CALR	0	0	0	0
CALR_A_296	CALR	0	0	0	0
CALR_A_305	CALR	0	0	0	0
CALR_A_313	CALR	0	0	0	0
CALR_A_338	CALR	0	0	0	0
CALR_A_36	CALR	0	0	0	0
CALR_A_364	CALR	0	0	0	0
CALR_A_383	CALR	0	0	0	0
CALR_A_392	CALR	0	0	0	0
CALR_A_398	CALR	0	0	0	0
CALR_A_399	CALR	0	0	0	0
CALR_A_428	CALR	0	0	0	0
CALR_A_429	CALR	0	0	0	0
CALR_A_449	CALR	0	0	0	0
CALR_A_452	CALR	0	0	0	0
CALR_A_454	CALR	0	0	0	0
CALR_A_497	CALR	0	0	0	0
CALR_A_500	CALR	0	0	0	0
CALR_A_514	CALR	0	0	0	0
CALR_A_55	CALR	0	0	0	0
CALR_A_562	CALR	0	0	0	0
CALR_A_577	CALR	0	0	0	0
CALR_A_584	CALR	0	0	0	0
CALR_A_606	CALR	0	0	0	0
CALR_A_627	CALR	0	0	0	0
CALR_A_648	CALR	0	0	0	0
CALR_A_66	CALR	0	0	0	0
CALR_A_662	CALR	0	0	0	0
CALR_A_674	CALR	0	0	0	0
CALR_A_68	CALR	0	0	0	0
CALR_A_680	CALR	0	0	0	0
CALR_A_682	CALR	0	0	0	0
CALR_A_699	CALR	0	0	0	0
CALR_A_702	CALR	0	0	0	0
CALR_S_117	CALR	0	0	0	0
CALR_S_152	CALR	0	0	0	0
CALR_S_168	CALR	0	0	0	0
CALR_S_172	CALR	0	0	0	0
CALR_S_174	CALR	0	0	0	0
CALR_S_18	CALR	0	0	0	0
CALR_S_196	CALR	0	0	0	0
CALR_S_197	CALR	0	0	0	0
CALR_S_198	CALR	0	0	0	0
CALR_S_212	CALR	0	0	0	0
CALR_S_213	CALR	0	0	0	0
CALR_S_232	CALR	0	0	0	0
CALR_S_25	CALR	0	0	0	0
CALR_S_259	CALR	0	0	0	0
CALR_S_260	CALR	0	0	0	0
CALR_S_271	CALR	0	0	0	0
CALR_S_278	CALR	0	0	0	0
CALR_S_283	CALR	0	0	0	0
CALR_S_286	CALR	0	0	0	0
CALR_S_29	CALR	0	0	0	0
CALR_S_398	CALR	0	0	0	0
CALR_S_419	CALR	0	0	0	0
CALR_S_442	CALR	0	0	0	0
CALR_S_454	CALR	0	0	0	0
CALR_S_464	CALR	0	0	0	0
CALR_S_503	CALR	0	0	0	0
CALR_S_509	CALR	0	0	0	0
CALR_S_536	CALR	0	0	0	0
CALR_S_54	CALR	0	0	0	0
CALR_S_556	CALR	0	0	0	0
CALR_S_561	CALR	0	0	0	0
CALR_S_608	CALR	0	0	0	0
CALR_S_609	CALR	0	0	0	0
CALR_S_630	CALR	0	0	0	0
CALR_S_631	CALR	0	0	0	0
CALR_S_653	CALR	0	0	0	0
CALR_S_673	CALR	0	0	0	0
CALR_S_675	CALR	0	0	0	0
CALR_S_694	CALR	0	0	0	0
CALR_S_740	CALR	0	0	0	0
CALR_S_743	CALR	0	0	0	0
CALR_S_779	CALR	0	0	0	0
CALR_S_784	CALR	0	0	0	0
CALR_S_796	CALR	0	0	0	0
CALR_S_831	CALR	0	0	0	0
CALR_S_835	CALR	0	0	0	0
CALR_S_837	CALR	0	0	0	0
CALR_S_861	CALR	0	0	0	0
CALR_S_865	CALR	0	0	0	0
CALR_S_868	CALR	0	0	0	0
CALR_S_97	CALR	0	0	0	0
CALR_A_610	CALR	0	0	0	0
CALR_S_523	CALR	0	0	0	0
CALR_S_626	CALR	0	0	0	0
CALR_S_628	CALR	0	0	0	0
CALR_S_682	CALR	0	0	0	0
CALR_S_702	CALR	0	0	0	0
CALR_S_705	CALR	0	0	0	0
CALR_S_706	CALR	0	0	0	0
CALR_S_729	CALR	0	0	0	0
CALR_S_747	CALR	0	0	0	0
CALR_S_825	CALR	0	0	0	0
CALR_S_839	CALR	0	0	0	0
CALR_A_87	CALR	0	0	0	0
CALR_A_88	CALR	0	0	0	0
CALR_A_96	CALR	0	0	0	0
CALR_A_97	CALR	0	0	0	0
CALR_S_543	CALR	0	0	0	0
CALR_S_321	CALR	0	0	0	0
CALR_S_809	CALR	0	0	0	0
CALR_S_871	CALR	0	0	0	0
CALR_S_547	CALR	0	0	0	0
ntc_19_48_p	ntc	0	0	0	0
ntc_35_64_m	ntc	0	0	0	0
ntc_43_72_p	ntc	0	0	0	0
ntc_46_75_p	ntc	0	0	0	0
ntc_49_78_m	ntc	0	0	0	0
ntc_50_79_m	ntc	0	0	0	0
ntc_60_89_p	ntc	0	0	0	0
ntc_92_121_p	ntc	0	0	0	0
ntc_100_129_m	ntc	0	0	0	0
ntc_101_130_m	ntc	0	0	0	0
ntc_106_135_m	ntc	0	0	0	0
ntc_107_136_m	ntc	0	0	0	0
ntc_132_161_m	ntc	0	0	0	0
ntc_133_162_m	ntc	0	0	0	0
ntc_138_167_m	ntc	0	0	0	0
ntc_160_189_p	ntc	0	0	0	0
ntc_161_190_p	ntc	0	0	0	0
ntc_168_197_m	ntc	0	0	0	0
ntc_179_208_p	ntc	0	0	0	0
ntc_224_253_m	ntc	0	0	0	0
ntc_227_256_p	ntc	0	0	0	0
ntc_234_263_p	ntc	0	0	0	0
ntc_237_266_p	ntc	0	0	0	0
ntc_247_276_p	ntc	0	0	0	0
ntc_248_277_p	ntc	0	0	0	0
ntc_254_283_p	ntc	0	0	0	0
ntc_255_284_p	ntc	0	0	0	0
ntc_256_285_p	ntc	0	0	0	0
ntc_257_286_p	ntc	0	0	0	0
ntc_268_297_p	ntc	0	0	0	0
ntc_269_298_p	ntc	0	0	0	0
ntc_279_308_p	ntc	0	0	0	0
ntc_280_309_p	ntc	0	0	0	0
ntc_299_328_m	ntc	0	0	0	0
ntc_306_335_m	ntc	0	0	0	0
ntc_307_336_p	ntc	0	0	0	0
ntc_307_336_m	ntc	0	0	0	0
ntc_325_354_m	ntc	0	0	0	0
ntc_334_363_p	ntc	0	0	0	0
ntc_348_377_p	ntc	0	0	0	0
ntc_351_380_m	ntc	0	0	0	0
ntc_353_382_p	ntc	0	0	0	0
ntc_358_387_p	ntc	0	0	0	0
ntc_364_393_m	ntc	0	0	0	0
ntc_367_396_p	ntc	0	0	0	0
ntc_368_397_p	ntc	0	0	0	0
ntc_378_407_p	ntc	0	0	0	0
ntc_382_411_m	ntc	0	0	0	0
ntc_383_412_m	ntc	0	0	0	0
ntc_384_413_m	ntc	0	0	0	0
ntc_393_422_m	ntc	0	0	0	0
ntc_394_423_m	ntc	0	0	0	0
ntc_398_427_p	ntc	0	0	0	0
ntc_403_432_m	ntc	0	0	0	0
ntc_404_433_m	ntc	0	0	0	0
ntc_408_437_p	ntc	0	0	0	0
ntc_458_487_m	ntc	0	0	0	0
ntc_465_494_m	ntc	0	0	0	0
ntc_466_495_m	ntc	0	0	0	0
ntc_2009_2038_p	ntc	0	0	0	0
