# Supplementary material for: CRISPR-Cas9-Mediated Cytosine Base Editing Screen for the Functional Assessment of CALR Intron Variants in Japanese Encephalitis Virus Replication
Source: Int J Mol Sci. 2023 Aug 28;24(17):13331. doi: 10.3390/ijms241713331 (PMC10487596; doi:10.3390/ijms241713331)
Supplement: Supplementary file 1 [file ijms-24-13331-s001.zip › Supplementary Table S4_Deep_sequencing_surviving cells.xls]

## Sheet: 63_result
sgRNA	gene	sample1	sample2	sample1	sample2
CALR_S_215	CALR	64821	64344	64598.2	65119.5
CALR_A_521	CALR	64821	64344	64598.2	65119.5
CALR_A_488	CALR	52421	51678	52240.8	52300.9
ntc_61_90_m	ntc	9707	9535	9673.63	9649.93
CALR_S_139	CALR	9408	9168	9375.66	9278.5
CALR_A_99	CALR	6691	6679	6668	6759.5
CALR_S_408	CALR	5836	5670	5815.94	5738.34
CALR_S_572	CALR	5014	4969	4996.76	5028.89
ntc_46_75_p	ntc	4759	4699	4742.64	4755.64
CALR_S_73	CALR	4665	4610	4648.96	4665.56
CALR_A_293	CALR	4107	4003	4092.88	4051.25
CALR_A_237	CALR	3957	3851	3943.4	3897.42
CALR_S_587	CALR	3622	3506	3609.55	3548.26
CALR_A_158	CALR	3534	3509	3521.85	3551.29
CALR_A_4	CALR	3505	3436	3492.95	3477.41
CALR_S_407	CALR	3505	3431	3492.95	3472.35
CALR_S_726	CALR	3297	3244	3285.67	3283.1
CALR_A_134	CALR	3039	3023	3028.55	3059.44
CALR_S_637	CALR	2957	2929	2946.83	2964.3
CALR_A_500	CALR	2895	2809	2885.05	2842.86
CALR_A_238	CALR	2834	2805	2824.26	2838.81
CALR_S_81	CALR	2788	2778	2778.42	2811.48
CALR_A_489	CALR	2780	2724	2770.44	2756.83
ntc_19_48_p	ntc	2730	2711	2720.61	2743.68
CALR_S_67	CALR	2727	2691	2717.62	2723.43
CALR_S_3	CALR	2753	2661	2743.54	2693.07
CALR_S_501	CALR	2724	2643	2714.64	2674.86
CALR_S_191	CALR	2610	2585	2601.03	2616.16
CALR_A_517	CALR	2506	2391	2497.38	2419.82
CALR_A_166	CALR	2432	2358	2423.64	2386.42
CALR_A_619	CALR	2384	2357	2375.8	2385.41
CALR_S_78	CALR	2384	2357	2375.8	2385.41
CALR_A_456	CALR	2390	2347	2381.78	2375.29
CALR_S_907	CALR	2353	2291	2344.91	2318.61
CALR_A_692	CALR	2291	2319	2283.12	2346.95
CALR_S_293	CALR	2330	2271	2321.99	2298.37
CALR_A_243	CALR	2308	2278	2300.07	2305.46
CALR_S_613	CALR	2303	2252	2295.08	2279.14
CALR_A_590	CALR	2299	2254	2291.1	2281.17
CALR_S_13	CALR	2256	2147	2248.24	2172.88
CALR_A_173	CALR	2212	2170	2204.4	2196.16
CALR_S_619	CALR	2212	2170	2204.4	2196.16
CALR_A_279	CALR	2208	2164	2200.41	2190.08
CALR_A_631	CALR	2159	2112	2151.58	2137.46
CALR_A_368	CALR	2119	2104	2111.72	2129.36
ntc_60_89_p	ntc	2128	2095	2120.68	2120.25
CALR_A_695	CALR	2034	2015	2027.01	2039.29
CALR_A_159	CALR	1985	1966	1978.18	1989.7
CALR_S_252	CALR	1977	1948	1970.2	1971.48
CALR_A_215	CALR	1960	1918	1953.26	1941.12
CALR_S_120	CALR	1922	1886	1915.39	1908.73
CALR_A_620	CALR	1926	1846	1919.38	1868.25
CALR_S_906	CALR	1881	1818	1874.53	1839.91
CALR_S_57	CALR	1855	1840	1848.62	1862.18
ntc_22_51_p	ntc	1859	1835	1852.61	1857.12
CALR_S_434	CALR	1840	1796	1833.67	1817.65
CALR_A_378	CALR	1832	1791	1825.7	1812.59
CALR_S_382	CALR	1832	1789	1825.7	1810.56
ntc_43_72_p	ntc	1783	1764	1776.87	1785.26
CALR_A_2	CALR	1749	1705	1742.99	1725.55
CALR_A_47	CALR	1734	1710	1728.04	1730.61
CALR_S_896	CALR	1669	1631	1663.26	1650.66
CALR_A_530	CALR	1668	1626	1662.27	1645.6
CALR_S_425	CALR	1564	1536	1558.62	1554.51
CALR_S_579	CALR	1538	1514	1532.71	1532.25
CALR_S_380	CALR	1536	1505	1530.72	1523.14
CALR_S_789	CALR	1527	1511	1521.75	1529.21
CALR_A_112	CALR	1494	1473	1488.86	1490.75
CALR_S_385	CALR	1486	1456	1480.89	1473.55
CALR_A_265	CALR	1483	1458	1477.9	1475.57
CALR_S_262	CALR	1466	1470	1460.96	1487.72
CALR_A_62	CALR	1467	1462	1461.96	1479.62
CALR_S_149	CALR	1458	1446	1452.99	1463.43
CALR_A_573	CALR	1458	1446	1452.99	1463.43
CALR_A_336	CALR	1436	1431	1431.06	1448.25
CALR_A_622	CALR	1433	1430	1428.07	1447.24
CALR_A_685	CALR	1432	1404	1427.08	1420.92
CALR_A_376	CALR	1403	1364	1398.18	1380.44
CALR_A_498	CALR	1382	1353	1377.25	1369.31
CALR_S_58	CALR	1371	1362	1366.29	1378.42
CALR_A_369	CALR	1345	1336	1340.38	1352.1
CALR_S_541	CALR	1353	1327	1348.35	1342.99
CALR_S_432	CALR	1350	1306	1345.36	1321.74
CALR_A_192	CALR	1338	1316	1333.4	1331.86
CALR_A_213	CALR	1326	1284	1321.44	1299.48
CALR_S_620	CALR	1308	1286	1303.5	1301.5
CALR_A_512	CALR	1304	1288	1299.52	1303.52
CALR_A_572	CALR	1289	1288	1284.57	1303.52
CALR_A_281	CALR	1271	1254	1266.63	1269.11
CALR_S_461	CALR	1260	1263	1255.67	1278.22
CALR_S_696	CALR	1267	1256	1262.64	1271.14
CALR_A_32	CALR	1304	1185	1299.52	1199.28
ntc_49_78_m	ntc	1257	1227	1252.68	1241.79
CALR_S_247	CALR	1240	1242	1235.74	1256.97
CALR_S_387	CALR	1237	1227	1232.75	1241.79
CALR_S_638	CALR	1223	1202	1218.8	1216.49
CALR_A_167	CALR	1223	1202	1218.8	1216.49
CALR_A_133	CALR	1206	1197	1201.85	1211.43
ntc_50_79_m	ntc	1204	1189	1199.86	1203.33
CALR_A_371	CALR	1197	1190	1192.88	1204.34
CALR_S_145	CALR	1199	1166	1194.88	1180.05
CALR_S_496	CALR	1180	1184	1175.94	1198.27
CALR_A_132	CALR	1171	1152	1166.97	1165.89
CALR_A_212	CALR	1168	1143	1163.98	1156.78
CALR_A_320	CALR	1169	1135	1164.98	1148.68
CALR_A_7	CALR	1138	1136	1134.09	1149.69
CALR_A_110	CALR	1133	1127	1129.1	1140.58
CALR_A_665	CALR	1137	1091	1133.09	1104.15
CALR_S_38	CALR	1137	1091	1133.09	1104.15
CALR_S_571	CALR	1115	1102	1111.17	1115.28
CALR_S_288	CALR	1112	1105	1108.18	1118.32
CALR_A_539	CALR	1103	1089	1099.21	1102.13
CALR_S_406	CALR	1099	1081	1095.22	1094.03
CALR_A_300	CALR	1096	1080	1092.23	1093.02
CALR_S_392	CALR	1090	1076	1086.25	1088.97
ntc_4_33_m	ntc	1088	1060	1084.26	1072.78
CALR_A_531	CALR	1091	1055	1087.25	1067.72
CALR_A_262	CALR	1069	1045	1065.32	1057.6
CALR_S_790	CALR	1060	1050	1056.36	1062.66
CALR_A_574	CALR	1050	1043	1046.39	1055.57
CALR_A_705	CALR	1056	1023	1052.37	1035.33
CALR_S_622	CALR	1038	1026	1034.43	1038.37
CALR_S_615	CALR	1021	989	1017.49	1000.92
CALR_S_200	CALR	1008	976	1004.53	987.764
CALR_S_143	CALR	978	954	974.638	965.499
CALR_A_580	CALR	978	954	974.638	965.499
CALR_S_229	CALR	976	953	972.645	964.487
CALR_S_289	CALR	958	966	954.707	977.643
CALR_S_611	CALR	980	941	976.631	952.342
CALR_A_76	CALR	965	955	961.682	966.511
CALR_S_431	CALR	965	943	961.682	954.366
CALR_S_287	CALR	952	939	948.727	950.318
CALR_S_16	CALR	944	936	940.755	947.282
CALR_A_556	CALR	937	922	933.779	933.113
CALR_S_164	CALR	931	897	927.799	907.812
CALR_A_234	CALR	927	900	923.813	910.848
CALR_S_103	CALR	922	901	918.83	911.86
CALR_S_428	CALR	903	894	899.896	904.775
CALR_S_623	CALR	888	871	884.947	881.498
CALR_A_195	CALR	878	865	874.982	875.426
CALR_A_221	CALR	866	865	863.023	875.426
CALR_S_763	CALR	845	837	842.095	847.088
CALR_A_532	CALR	852	828	849.071	837.98
CALR_S_760	CALR	850	826	847.078	835.956
CALR_S_833	CALR	838	814	835.119	823.811
CALR_A_163	CALR	823	801	820.171	810.654
CALR_S_772	CALR	809	808	806.219	817.739
CALR_A_614	CALR	821	794	818.178	803.57
CALR_S_592	CALR	816	790	813.195	799.522
CALR_A_129	CALR	809	773	806.219	782.317
CALR_A_542	CALR	799	771	796.253	780.293
CALR_S_422	CALR	793	775	790.274	784.341
CALR_A_625	CALR	792	771	789.277	780.293
CALR_S_497	CALR	773	766	770.343	775.233
CALR_A_92	CALR	752	746	749.415	754.992
CALR_A_217	CALR	747	737	744.432	745.883
CALR_S_898	CALR	750	726	747.422	734.751
CALR_A_227	CALR	759	717	756.391	725.642
CALR_S_570	CALR	737	732	734.466	740.823
CALR_A_461	CALR	731	716	728.487	724.63
CALR_A_596	CALR	731	711	728.487	719.57
CALR_S_402	CALR	711	721	708.556	729.69
CALR_A_50	CALR	713	705	710.549	713.497
CALR_S_5	CALR	717	701	714.535	709.449
CALR_S_22	CALR	672	668	669.69	676.051
CALR_A_189	CALR	671	667	668.693	675.039
CALR_A_200	CALR	667	670	664.707	678.076
CALR_S_731	CALR	665	664	662.714	672.003
CALR_S_202	CALR	668	660	665.704	667.955
CALR_S_905	CALR	651	637	648.762	644.678
CALR_S_374	CALR	720	563	717.525	569.786
CALR_A_491	CALR	639	641	636.803	648.726
CALR_S_4	CALR	648	625	645.772	632.533
CALR_A_591	CALR	636	632	633.814	639.618
CALR_A_79	CALR	627	616	624.844	623.425
CALR_S_754	CALR	627	616	624.844	623.425
CALR_S_430	CALR	610	594	607.903	601.16
CALR_S_35	CALR	600	592	597.937	599.135
CALR_S_698	CALR	597	592	594.948	599.135
CALR_A_149	CALR	587	589	584.982	596.099
CALR_S_724	CALR	593	582	590.961	589.015
CALR_S_457	CALR	586	571	583.985	577.882
CALR_A_146	CALR	589	566	586.975	572.822
CALR_A_241	CALR	580	564	578.006	570.798
CALR_S_666	CALR	579	562	577.009	568.774
CALR_S_159	CALR	569	559	567.044	565.738
CALR_S_781	CALR	570	554	568.04	560.677
CALR_A_334	CALR	563	550	561.064	556.629
CALR_A_34	CALR	560	547	558.075	553.593
CALR_A_467	CALR	554	548	552.095	554.605
CALR_S_27	CALR	559	539	557.078	545.497
CALR_S_852	CALR	548	541	546.116	547.521
CALR_S_74	CALR	536	537	534.157	543.472
CALR_A_220	CALR	537	532	535.154	538.412
CALR_A_682	CALR	545	521	543.126	527.28
CALR_S_71	CALR	537	521	535.154	527.28
CALR_S_97	CALR	527	526	525.188	532.34
CALR_S_809	CALR	544	506	542.13	512.099
CALR_S_758	CALR	525	501	523.195	507.039
CALR_S_817	CALR	511	510	509.243	516.147
CALR_S_459	CALR	507	513	505.257	519.183
CALR_A_522	CALR	500	520	498.281	526.268
CALR_S_261	CALR	504	500	502.267	506.027
CALR_S_745	CALR	503	498	501.271	504.002
CALR_A_652	CALR	496	496	494.295	501.978
CALR_S_780	CALR	502	488	500.274	493.882
CALR_S_786	CALR	497	490	495.291	495.906
CALR_A_185	CALR	498	486	496.288	491.858
CALR_A_439	CALR	494	487	492.302	492.87
CALR_S_209	CALR	488	486	486.322	491.858
CALR_S_511	CALR	487	476	485.326	481.737
CALR_S_481	CALR	477	476	475.36	481.737
CALR_S_471	CALR	477	471	475.36	476.677
CALR_S_415	CALR	472	467	470.377	472.629
CALR_S_216	CALR	463	455	461.408	460.484
CALR_S_686	CALR	454	462	452.439	467.569
CALR_S_673	CALR	455	456	453.436	461.496
CALR_S_863	CALR	450	454	448.453	459.472
CALR_S_264	CALR	461	442	459.415	447.327
CALR_S_584	CALR	452	448	450.446	453.4
CALR_S_378	CALR	452	448	450.446	453.4
CALR_S_161	CALR	451	447	449.45	452.388
CALR_A_638	CALR	445	450	443.47	455.424
CALR_A_702	CALR	452	440	450.446	445.303
CALR_S_742	CALR	443	441	441.477	446.315
CALR_S_417	CALR	443	441	441.477	446.315
CALR_S_416	CALR	444	440	442.474	445.303
CALR_S_105	CALR	447	433	445.463	438.219
CALR_S_52	CALR	450	427	448.453	432.147
CALR_A_314	CALR	442	430	440.48	435.183
CALR_S_642	CALR	430	439	428.522	444.291
CALR_S_189	CALR	431	428	429.518	433.159
CALR_S_900	CALR	427	426	425.532	431.135
CALR_A_247	CALR	431	422	429.518	427.086
CALR_S_393	CALR	427	424	425.532	429.11
CALR_A_451	CALR	423	422	421.546	427.086
CALR_S_499	CALR	427	415	425.532	420.002
CALR_S_465	CALR	416	412	414.57	416.966
CALR_A_250	CALR	415	411	413.573	415.954
CALR_S_730	CALR	411	407	409.587	411.906
CALR_S_104	CALR	416	400	414.57	404.821
CALR_A_74	CALR	409	400	407.594	404.821
CALR_S_375	CALR	405	384	403.608	388.628
CALR_S_535	CALR	388	385	386.666	389.64
CALR_A_506	CALR	394	378	392.645	382.556
CALR_S_595	CALR	377	378	375.704	382.556
CALR_S_152	CALR	380	375	378.694	379.52
CALR_S_768	CALR	379	372	377.697	376.484
CALR_S_271	CALR	376	374	374.707	378.508
CALR_S_224	CALR	375	375	373.711	379.52
CALR_A_206	CALR	374	363	372.714	367.375
CALR_S_854	CALR	375	359	373.711	363.327
CALR_A_360	CALR	365	365	363.745	369.399
CALR_S_405	CALR	371	358	369.725	362.315
CALR_S_452	CALR	362	364	360.755	368.387
CALR_A_447	CALR	366	360	364.742	364.339
CALR_A_36	CALR	364	360	362.749	364.339
CALR_S_775	CALR	357	365	355.773	369.399
CALR_S_446	CALR	366	356	364.742	360.291
CALR_S_225	CALR	361	359	359.759	363.327
CALR_A_678	CALR	362	352	360.755	356.243
CALR_A_664	CALR	356	353	354.776	357.255
CALR_A_274	CALR	357	349	355.773	353.207
CALR_S_857	CALR	354	348	352.783	352.194
CALR_S_509	CALR	349	346	347.8	350.17
CALR_S_787	CALR	351	343	349.793	347.134
CALR_A_275	CALR	346	346	344.811	350.17
CALR_A_253	CALR	348	343	346.804	347.134
CALR_S_51	CALR	346	338	344.811	342.074
CALR_S_500	CALR	346	333	344.811	337.014
CALR_S_427	CALR	337	337	335.841	341.062
CALR_A_347	CALR	336	329	334.845	332.965
CALR_S_410	CALR	336	329	334.845	332.965
CALR_S_643	CALR	325	328	323.883	331.953
CALR_A_329	CALR	328	325	326.872	328.917
CALR_S_503	CALR	334	315	332.852	318.797
CALR_A_659	CALR	327	315	325.876	318.797
CALR_S_675	CALR	317	311	315.91	314.748
CALR_A_188	CALR	312	308	310.927	311.712
CALR_A_706	CALR	313	304	311.924	307.664
CALR_A_675	CALR	308	307	306.941	310.7
CALR_A_549	CALR	305	307	303.951	310.7
CALR_S_178	CALR	305	307	303.951	310.7
CALR_A_449	CALR	306	298	304.948	301.592
CALR_A_707	CALR	305	298	303.951	301.592
CALR_S_841	CALR	305	292	303.951	295.519
CALR_S_524	CALR	302	289	300.962	292.483
CALR_S_180	CALR	293	297	291.993	300.58
CALR_S_142	CALR	293	297	291.993	300.58
ntc_35_64_m	ntc	292	284	290.996	287.423
CALR_S_398	CALR	289	284	288.006	287.423
CALR_S_632	CALR	280	283	279.037	286.411
CALR_A_251	CALR	285	278	284.02	281.351
CALR_A_246	CALR	283	274	282.027	277.303
CALR_A_507	CALR	281	269	280.034	272.242
CALR_S_204	CALR	275	271	274.055	274.266
CALR_S_593	CALR	279	266	278.041	269.206
CALR_S_203	CALR	264	264	263.092	267.182
CALR_A_414	CALR	262	260	261.099	263.134
CALR_A_44	CALR	262	258	261.099	261.11
CALR_A_694	CALR	261	258	260.103	261.11
CALR_A_202	CALR	258	252	257.113	255.037
CALR_S_491	CALR	255	252	254.123	255.037
CALR_A_193	CALR	245	251	244.158	254.025
CALR_S_211	CALR	248	245	247.147	247.953
CALR_A_600	CALR	245	243	244.158	245.929
CALR_S_243	CALR	248	240	247.147	242.893
CALR_S_208	CALR	238	241	237.182	243.905
CALR_S_100	CALR	243	235	242.165	237.832
CALR_S_195	CALR	237	228	236.185	230.748
CALR_S_118	CALR	231	231	230.206	233.784
CALR_A_404	CALR	233	227	232.199	229.736
CALR_S_188	CALR	226	227	225.223	229.736
CALR_S_521	CALR	224	224	223.23	226.7
CALR_A_440	CALR	224	222	223.23	224.676
CALR_S_101	CALR	225	219	224.226	221.64
CALR_S_565	CALR	224	219	223.23	221.64
CALR_A_156	CALR	225	217	224.226	219.616
CALR_S_273	CALR	219	219	218.247	221.64
CALR_S_182	CALR	217	218	216.254	220.628
CALR_A_207	CALR	218	208	217.251	210.507
CALR_S_480	CALR	211	211	210.275	213.543
CALR_A_701	CALR	212	208	211.271	210.507
CALR_S_871	CALR	207	205	206.288	207.471
CALR_S_647	CALR	207	204	206.288	206.459
CALR_S_839	CALR	203	202	202.302	204.435
CALR_A_469	CALR	202	202	201.306	204.435
CALR_S_18	CALR	202	202	201.306	204.435
CALR_S_29	CALR	200	202	199.312	204.435
ntc_466_495_m	ntc	205	195	204.295	197.35
CALR_A_296	CALR	198	199	197.319	201.399
CALR_S_740	CALR	200	197	199.312	199.374
CALR_S_86	CALR	197	189	196.323	191.278
CALR_S_85	CALR	190	185	189.347	187.23
CALR_S_493	CALR	186	188	185.361	190.266
CALR_A_285	CALR	186	188	185.361	190.266
CALR_A_68	CALR	186	182	185.361	184.194
CALR_A_441	CALR	185	183	184.364	185.206
CALR_A_60	CALR	185	181	184.364	183.182
CALR_A_562	CALR	184	177	183.367	179.133
CALR_S_630	CALR	182	176	181.374	178.121
CALR_S_861	CALR	173	163	172.405	164.965
CALR_S_242	CALR	167	167	166.426	169.013
CALR_A_650	CALR	168	165	167.422	166.989
CALR_A_298	CALR	165	167	164.433	169.013
CALR_A_455	CALR	154	160	153.471	161.928
CALR_S_90	CALR	159	154	158.453	155.856
CALR_A_363	CALR	158	150	157.457	151.808
CALR_A_566	CALR	151	156	150.481	157.88
CALR_S_561	CALR	149	155	148.488	156.868
CALR_A_606	CALR	152	151	151.477	152.82
CALR_A_454	CALR	150	150	149.484	151.808
CALR_S_42	CALR	151	148	150.481	149.784
CALR_S_875	CALR	150	147	149.484	148.772
CALR_A_218	CALR	150	142	149.484	143.712
CALR_S_580	CALR	150	142	149.484	143.712
CALR_S_213	CALR	144	142	143.505	143.712
CALR_S_464	CALR	140	143	139.519	144.724
CALR_A_610	CALR	141	135	140.515	136.627
CALR_A_66	CALR	137	138	136.529	139.663
CALR_S_523	CALR	142	131	141.512	132.579
ntc_256_285_p	ntc	135	137	134.536	138.651
CALR_S_536	CALR	135	134	134.536	135.615
ntc_279_308_p	ntc	134	134	133.539	135.615
CALR_S_847	CALR	134	132	133.539	133.591
CALR_A_398	CALR	130	131	129.553	132.579
CALR_A_184	CALR	130	127	129.553	128.531
CALR_S_548	CALR	124	123	123.574	124.483
CALR_A_452	CALR	122	121	121.581	122.458
CALR_S_297	CALR	118	120	117.594	121.446
CALR_S_171	CALR	119	113	118.591	114.362
ntc_234_263_p	ntc	116	113	115.601	114.362
ntc_257_286_p	ntc	114	115	113.608	116.386
CALR_A_142	CALR	114	109	113.608	110.314
CALR_S_412	CALR	111	112	110.618	113.35
CALR_A_551	CALR	112	110	111.615	111.326
ntc_255_284_p	ntc	110	111	109.622	112.338
CALR_S_850	CALR	107	110	106.632	111.326
ntc_179_208_p	ntc	108	108	107.629	109.302
ntc_133_162_m	ntc	108	107	107.629	108.29
CALR_S_442	CALR	109	105	108.625	106.266
CALR_S_631	CALR	108	106	107.629	107.278
CALR_A_605	CALR	109	104	108.625	105.254
CALR_S_752	CALR	106	105	105.636	106.266
CALR_S_283	CALR	104	106	103.642	107.278
CALR_S_543	CALR	104	103	103.642	104.241
ntc_382_411_m	ntc	101	100	100.653	101.205
ntc_383_412_m	ntc	101	100	100.653	101.205
CALR_S_154	CALR	101	98	100.653	99.1812
CALR_A_662	CALR	98	100	97.6631	101.205
CALR_A_627	CALR	98	98	97.6631	99.1812
CALR_S_198	CALR	98	93	97.6631	94.1209
CALR_S_212	CALR	93	95	92.6803	96.145
CALR_S_608	CALR	93	93	92.6803	94.1209
CALR_A_443	CALR	92	93	91.6837	94.1209
CALR_S_793	CALR	94	89	93.6768	90.0727
CALR_A_383	CALR	89	93	88.694	94.1209
CALR_A_708	CALR	92	88	91.6837	89.0607
CALR_S_99	CALR	90	89	89.6906	90.0727
CALR_S_286	CALR	89	87	88.694	88.0486
CALR_S_626	CALR	88	86	87.6975	87.0366
ntc_348_377_p	ntc	87	87	86.7009	88.0486
CALR_S_172	CALR	86	86	85.7043	87.0366
CALR_A_680	CALR	87	85	86.7009	86.0245
ntc_247_276_p	ntc	85	82	84.7078	82.9883
ntc_307_336_m	ntc	81	82	80.7215	82.9883
CALR_A_648	CALR	82	80	81.7181	80.9642
CALR_A_313	CALR	80	79	79.725	79.9522
CALR_S_197	CALR	79	79	78.7284	79.9522
CALR_A_139	CALR	78	79	77.7318	79.9522
CALR_S_609	CALR	76	79	75.7387	79.9522
ntc_160_189_p	ntc	78	77	77.7318	77.9281
CALR_A_497	CALR	78	76	77.7318	76.916
ntc_465_494_m	ntc	80	73	79.725	73.8799
CALR_S_566	CALR	75	77	74.7422	77.9281
CALR_A_674	CALR	77	74	76.7353	74.8919
CALR_A_183	CALR	76	72	75.7387	72.8678
ntc_458_487_m	ntc	72	74	71.7525	74.8919
CALR_S_645	CALR	72	72	71.7525	72.8678
ntc_280_309_p	ntc	70	72	69.7594	72.8678
CALR_S_873	CALR	70	71	69.7594	71.8558
CALR_A_699	CALR	70	68	69.7594	68.8196
CALR_A_286	CALR	66	70	65.7731	70.8437
ntc_2009_2038_p	ntc	66	69	65.7731	69.8317
CALR_A_305	CALR	69	65	68.7628	65.7834
ntc_92_121_p	ntc	66	68	65.7731	68.8196
ntc_307_336_p	ntc	67	66	66.7697	66.7955
ntc_132_161_m	ntc	67	66	66.7697	66.7955
CALR_S_117	CALR	67	66	66.7697	66.7955
ntc_398_427_p	ntc	66	65	65.7731	65.7834
CALR_S_321	CALR	65	65	64.7765	65.7834
CALR_A_201	CALR	63	64	62.7834	64.7714
CALR_S_653	CALR	64	63	63.78	63.7593
CALR_S_196	CALR	64	62	63.78	62.7473
CALR_S_835	CALR	62	61	61.7869	61.7352
ntc_394_423_m	ntc	61	61	60.7903	61.7352
CALR_S_825	CALR	61	60	60.7903	60.7232
ntc_100_129_m	ntc	60	61	59.7937	61.7352
CALR_S_694	CALR	58	55	57.8006	55.6629
CALR_S_729	CALR	57	56	56.804	56.675
ntc_107_136_m	ntc	56	56	55.8075	56.675
CALR_S_779	CALR	53	53	52.8178	53.6388
CALR_S_560	CALR	54	49	53.8144	49.5906
CALR_S_702	CALR	51	52	50.8247	52.6268
CALR_S_40	CALR	51	49	50.8247	49.5906
CALR_A_584	CALR	48	49	47.835	49.5906
CALR_A_647	CALR	48	47	47.835	47.5665
CALR_S_370	CALR	54	39	53.8144	39.4701
ntc_403_432_m	ntc	46	47	45.8419	47.5665
ntc_227_256_p	ntc	43	49	42.8522	49.5906
CALR_S_168	CALR	47	43	46.8384	43.5183
ntc_367_396_p	ntc	45	45	44.8453	45.5424
CALR_S_837	CALR	45	44	44.8453	44.5303
CALR_S_175	CALR	45	43	44.8453	43.5183
ntc_334_363_p	ntc	44	42	43.8487	42.5062
CALR_S_831	CALR	43	42	42.8522	42.5062
CALR_S_260	CALR	44	40	43.8487	40.4821
CALR_S_454	CALR	41	41	40.859	41.4942
CALR_S_628	CALR	39	40	38.8659	40.4821
CALR_S_556	CALR	38	41	37.8694	41.4942
ntc_224_253_m	ntc	39	38	38.8659	38.458
ntc_351_380_m	ntc	40	36	39.8625	36.4339
ntc_353_382_p	ntc	40	36	39.8625	36.4339
ntc_106_135_m	ntc	39	37	38.8659	37.446
ntc_368_397_p	ntc	39	37	38.8659	37.446
ntc_325_354_m	ntc	38	37	37.8694	37.446
CALR_S_174	CALR	38	35	37.8694	35.4219
CALR_S_743	CALR	35	34	34.8797	34.4098
CALR_S_865	CALR	33	33	32.8866	33.3978
CALR_A_392	CALR	33	33	32.8866	33.3978
ntc_268_297_p	ntc	33	33	32.8866	33.3978
CALR_S_868	CALR	33	32	32.8866	32.3857
CALR_S_62	CALR	28	30	27.9037	30.3616
CALR_S_25	CALR	29	25	28.9003	25.3013
CALR_S_794	CALR	28	26	27.9037	26.3134
ntc_393_422_m	ntc	27	26	26.9072	26.3134
ntc_358_387_p	ntc	26	23	25.9106	23.2772
CALR_S_278	CALR	25	24	24.9141	24.2893
ntc_364_393_m	ntc	24	25	23.9175	25.3013
CALR_S_784	CALR	24	24	23.9175	24.2893
ntc_101_130_m	ntc	23	23	22.9209	23.2772
CALR_A_257	CALR	24	22	23.9175	22.2652
ntc_384_413_m	ntc	22	21	21.9244	21.2531
ntc_168_197_m	ntc	22	21	21.9244	21.2531
CALR_S_322	CALR	21	21	20.9278	21.2531
CALR_A_55	CALR	20	21	19.9312	21.2531
ntc_248_277_p	ntc	21	20	20.9278	20.2411
ntc_408_437_p	ntc	18	17	17.9381	17.2049
CALR_A_691	CALR	14	18	13.9519	18.217
CALR_A_514	CALR	17	15	16.9416	15.1808
ntc_306_335_m	ntc	15	15	14.9484	15.1808
ntc_269_298_p	ntc	15	15	14.9484	15.1808
CALR_A_429	CALR	14	15	13.9519	15.1808
ntc_161_190_p	ntc	14	15	13.9519	15.1808
CALR_S_419	CALR	16	13	15.945	13.1567
CALR_S_705	CALR	14	14	13.9519	14.1687
CALR_S_796	CALR	14	14	13.9519	14.1687
ntc_404_433_m	ntc	14	13	13.9519	13.1567
CALR_S_54	CALR	13	13	12.9553	13.1567
CALR_S_232	CALR	12	11	11.9587	11.1326
ntc_237_266_p	ntc	12	10	11.9587	10.1205
CALR_S_747	CALR	11	11	10.9622	11.1326
CALR_S_259	CALR	13	9	12.9553	9.10848
CALR_A_88	CALR	10	10	9.96562	10.1205
CALR_A_87	CALR	7	9	6.97594	9.10848
CALR_A_97	CALR	8	7	7.9725	7.08437
CALR_A_399	CALR	5	6	4.98281	6.07232
CALR_A_577	CALR	5	5	4.98281	5.06027
ntc_378_407_p	ntc	5	5	4.98281	5.06027
CALR_S_682	CALR	5	4	4.98281	4.04821
ntc_254_283_p	ntc	4	4	3.98625	4.04821
CALR_S_706	CALR	2	3	1.99312	3.03616
ntc_299_328_m	ntc	2	2	1.99312	2.02411
ntc_138_167_m	ntc	1	1	0.996562	1.01205
CALR_A_364	CALR	1	0	0.996562	0
CALR_A_288	CALR	0	0	0	0
CALR_A_338	CALR	0	0	0	0
CALR_A_428	CALR	0	0	0	0
CALR_A_96	CALR	0	0	0	0
CALR_S_547	CALR	0	0	0	0
