# Supplementary material for: CRISPR-Cas9-Mediated Cytosine Base Editing Screen for the Functional Assessment of CALR Intron Variants in Japanese Encephalitis Virus Replication
Source: Int J Mol Sci. 2023 Aug 28;24(17):13331. doi: 10.3390/ijms241713331 (PMC10487596; doi:10.3390/ijms241713331)
Supplement: Supplementary file 1 [file ijms-24-13331-s001.zip › Supplementary Table S5_CALR_mutation_probe_library.xls]

## Sheet: CALRlib
sgRNA	sequence(5'-3')	gene
CALR_A_129	GGGTTCTCTCACCACCTTCTAGG	CALR
CALR_A_132	CTCACCACCTTCTAGGTTGTTGG	CALR
CALR_A_133	TCACCACCTTCTAGGTTGTTGGG	CALR
CALR_A_134	CACCACCTTCTAGGTTGTTGGGG	CALR
CALR_A_139	TTGGGGTAAGTTAAATGAGTTGG	CALR
CALR_A_146	GCATATAAGTACATTAAAGCAGG	CALR
CALR_A_149	AAGTACATTAAAGCAGGTGCTGG	CALR
CALR_A_156	AAAAGCACTACTTTGCAGCCAGG	CALR
CALR_A_158	GCCAGGCCTCCCTTTACTCATGG	CALR
CALR_A_159	CCAGGCCTCCCTTTACTCATGGG	CALR
CALR_A_163	ATGGGTTGACCCTCAGCACTTGG	CALR
CALR_A_167	TCAGCACTTGGTGTCCCCTAGGG	CALR
CALR_A_173	GTCTCACCTGCCAGAGATCCAGG	CALR
CALR_A_183	TAGGCATAGATGTTGCTATCAGG	CALR
CALR_A_184	AGGCATAGATGTTGCTATCAGGG	CALR
CALR_A_185	GGCATAGATGTTGCTATCAGGGG	CALR
CALR_A_188	TTGCTATCAGGGGAGTACTCAGG	CALR
CALR_A_189	TGCTATCAGGGGAGTACTCAGGG	CALR
CALR_A_192	TACTCAGGGTTGTCTATTTCTGG	CALR
CALR_A_195	CAGGGTTGTCTATTTCTGGGTGG	CALR
CALR_A_2	TGGCCCCTACAGCTCATCCTTGG	CALR
CALR_A_200	GATCCAAGTGCCCTTGTAATCGG	CALR
CALR_A_201	ATCCAAGTGCCCTTGTAATCGGG	CALR
CALR_A_202	TCCAAGTGCCCTTGTAATCGGGG	CALR
CALR_A_206	ATCGGGGTTGTCAATCTGCCTGG	CALR
CALR_A_207	TCGGGGTTGTCAATCTGCCTGGG	CALR
CALR_A_212	TCCACTCACCCTGCAGAAGAAGG	CALR
CALR_A_213	CCACTCACCCTGCAGAAGAAGGG	CALR
CALR_A_215	ACCCTGCAGAAGAAGGGAACTGG	CALR
CALR_A_218	TGCAGAAGAAGGGAACTGGTGGG	CALR
CALR_A_220	AGAAGAAGGGAACTGGTGGGTGG	CALR
CALR_A_221	GAAGAAGGGAACTGGTGGGTGGG	CALR
CALR_A_227	AGAGATCAGTGCATTCCCCATGG	CALR
CALR_A_234	ACTGCCCTGCTCAGAGTCCCAGG	CALR
CALR_A_238	CCAGGCTCACCTTGTACTCTGGG	CALR
CALR_A_241	TACTCTGGGTTCTGTATCACTGG	CALR
CALR_A_243	TCTGGGTTCTGTATCACTGGCGG	CALR
CALR_A_247	ATCTCTTCATCCCAGTCTTCGGG	CALR
CALR_A_250	TCTTCGGGCTTCTTAGCATCAGG	CALR
CALR_A_251	CTTCGGGCTTCTTAGCATCAGGG	CALR
CALR_A_253	GGCTTCTTAGCATCAGGGTCAGG	CALR
CALR_A_257	TCAGGGTCAGGAATGTGTTCAGG	CALR
CALR_A_262	CAGGCTTGTCCCAGTCCTGAAGG	CALR
CALR_A_274	CCTCCACACTCTTCACCTTGAGG	CALR
CALR_A_275	CTCCACACTCTTCACCTTGAGGG	CALR
CALR_A_279	CCCACCCAAGCACCAACCTCAGG	CALR
CALR_A_281	CCAAGCACCAACCTCAGGTTTGG	CALR
CALR_A_285	ACCTCAGGTTTGGAGTCTGTAGG	CALR
CALR_A_286	CCTCAGGTTTGGAGTCTGTAGGG	CALR
CALR_A_288	GTCTGTAGGGTCATCAATTTTGG	CALR
CALR_A_296	TCTTCAGGCTTCACAGCATCAGG	CALR
CALR_A_298	TCAGGATCCTTTATCTTCTTAGG	CALR
CALR_A_300	GGATCCTTTATCTTCTTAGGCGG	CALR
CALR_A_305	GAAGTCCCAATCGTCCTCCAAGG	CALR
CALR_A_313	CTTCACCTCATAAGTATTATCGG	CALR
CALR_A_314	TTCACCTCATAAGTATTATCGGG	CALR
CALR_A_320	GCCGCACAATCAGTGTGTACAGG	CALR
CALR_A_329	TTCATCATCCTGAAGAGAGTAGG	CALR
CALR_A_336	GATGAGCGGCCCCACCCACCAGG	CALR
CALR_A_338	AGCGGCCCCACCCACCAGGCTGG	CALR
CALR_A_34	TACCCCCAAAAGCCCAGGACTGG	CALR
CALR_A_347	CCCCCAGATGCACCTTGCAACGG	CALR
CALR_A_36	AAAAGCCCAGGACTGGACCCTGG	CALR
CALR_A_360	GAAGATGACATGAACTTTCTTGG	CALR
CALR_A_363	ACATGAACTTTCTTGGTGCCAGG	CALR
CALR_A_364	CATGAACTTTCTTGGTGCCAGGG	CALR
CALR_A_368	GTGCCAGGGCCACAGATGTCCGG	CALR
CALR_A_369	TGCCAGGGCCACAGATGTCCGGG	CALR
CALR_A_371	GGCCACAGATGTCCGGGCCTTGG	CALR
CALR_A_376	TCCGGGCCTTGGTGAGAAGTAGG	CALR
CALR_A_378	GCCTTGGTGAGAAGTAGGTCCGG	CALR
CALR_A_383	GTAGGTCCGGTTAGAGTTAGAGG	CALR
CALR_A_392	AAAACTTGGTTCTTAAACGCAGG	CALR
CALR_A_398	GAATTCAGACTTTATCTCTAAGG	CALR
CALR_A_399	AATTCAGACTTTATCTCTAAGGG	CALR
CALR_A_4	CCTACAGCTCATCCTTGGCCTGG	CALR
CALR_A_404	GACTAAGAATAAAGAGTCAAAGG	CALR
CALR_A_414	GCTCAGAGAACTTGTAGAATTGG	CALR
CALR_A_428	AAGAAAAACTTAAGCATGTAAGG	CALR
CALR_A_429	AGAAAAACTTAAGCATGTAAGGG	CALR
CALR_A_439	GGCTATATATAAGGAACACACGG	CALR
CALR_A_440	GCTATATATAAGGAACACACGGG	CALR
CALR_A_441	CTATATATAAGGAACACACGGGG	CALR
CALR_A_443	TAAGGAACACACGGGGTTTCAGG	CALR
CALR_A_447	GGCTCCGTCTAACTAACCAGAGG	CALR
CALR_A_449	CGTCTAACTAACCAGAGGTCAGG	CALR
CALR_A_451	ACTAACCAGAGGTCAGGATCAGG	CALR
CALR_A_452	CTAACCAGAGGTCAGGATCAGGG	CALR
CALR_A_454	ACCAGAGGTCAGGATCAGGGTGG	CALR
CALR_A_455	CCAGAGGTCAGGATCAGGGTGGG	CALR
CALR_A_456	CAGAGGTCAGGATCAGGGTGGGG	CALR
CALR_A_461	ACCAAACATGATGTTGTATTCGG	CALR
CALR_A_467	AGTCTCCATGCATGTCTGTCTGG	CALR
CALR_A_469	TCTGTCTGGTCCAAACCATCTGG	CALR
CALR_A_47	CTCAGCGTAGGCCTCATCGTTGG	CALR
CALR_A_488	CGTCTGACCCTTGTTGCTGAAGG	CALR
CALR_A_489	GTCTGACCCTTGTTGCTGAAGGG	CALR
CALR_A_491	GTTGCTGAAGGGCTCAAATCTGG	CALR
CALR_A_497	TGGCCGACAGAGCGTAAAACCGG	CALR
CALR_A_498	GGCCGACAGAGCGTAAAACCGGG	CALR
CALR_A_50	AGGCCTCATCGTTGGTAATGAGG	CALR
CALR_A_500	GAGCGTAAAACCGGGCATCCTGG	CALR
CALR_A_506	GCTTGTCTGTAGCCCTAGCAAGG	CALR
CALR_A_507	CTTGTCTGTAGCCCTAGCAAGGG	CALR
CALR_A_512	CCTAGCAAGGGACGATAGTGAGG	CALR
CALR_A_514	AAGGGACGATAGTGAGGTCACGG	CALR
CALR_A_517	TCACGGCTCAGCCCAATCCCCGG	CALR
CALR_A_521	ATCCCCGGAGTACCCTTATGTGG	CALR
CALR_A_522	TCCCCGGAGTACCCTTATGTGGG	CALR
CALR_A_531	CTCCCCCTGCTCTGTTCCTAGGG	CALR
CALR_A_539	ACCCAAGCTGTGTGATGATTAGG	CALR
CALR_A_542	GATGATTAGGAGCTTCCTCCAGG	CALR
CALR_A_549	GGATCTGAGAACCCATCCCTAGG	CALR
CALR_A_55	AATGAGGAAGTTGTCAAAGATGG	CALR
CALR_A_551	TCTTACCTTTATCTTTCTCCTGG	CALR
CALR_A_556	CTGGTCACCGTAGAATTTGCCGG	CALR
CALR_A_562	AGAACGAATCTGCCAAAATCCGG	CALR
CALR_A_566	GCCAAAATCCGGTTTGTGTTTGG	CALR
CALR_A_572	AGCGATCAGTCCACCCGTCTAGG	CALR
CALR_A_573	GCGATCAGTCCACCCGTCTAGGG	CALR
CALR_A_574	CGATCAGTCCACCCGTCTAGGGG	CALR
CALR_A_577	CCACCCGTCTAGGGGACCAGAGG	CALR
CALR_A_580	GTCTAGGGGACCAGAGGAGCAGG	CALR
CALR_A_584	ACCAGAGGAGCAGGTCAGCGCGG	CALR
CALR_A_591	CCAAGACCCACAAGCTGCTAGGG	CALR
CALR_A_596	CTCTCTGACTTCCCCTACCCCGG	CALR
CALR_A_60	TGGTACCAGACTTGACCTGTAGG	CALR
CALR_A_600	CTCTAGTTTGACATCTCTAATGG	CALR
CALR_A_605	CTAATGGCTTAAGAGAGCCTCGG	CALR
CALR_A_606	TAATGGCTTAAGAGAGCCTCGGG	CALR
CALR_A_614	GCCCTAACTCCGGCCGCAGAAGG	CALR
CALR_A_619	CTGCGCCCTCCACGCTCCTCAGG	CALR
CALR_A_62	CAGACTTGACCTGTAGGACCAGG	CALR
CALR_A_620	TGCGCCCTCCACGCTCCTCAGGG	CALR
CALR_A_622	CCCTCCACGCTCCTCAGGGACGG	CALR
CALR_A_625	ACGCTCCTCAGGGACGGAGAAGG	CALR
CALR_A_627	TCCTCAGGGACGGAGAAGGAAGG	CALR
CALR_A_631	GAGAAGGAAGGATCGCCTTGCGG	CALR
CALR_A_638	GTCCCTGAAGACTACCGTGTTGG	CALR
CALR_A_647	TTACAGAAGACACGCAGATATGG	CALR
CALR_A_648	TACAGAAGACACGCAGATATGGG	CALR
CALR_A_650	AAGACACGCAGATATGGGCTAGG	CALR
CALR_A_652	ACACGCAGATATGGGCTAGGTGG	CALR
CALR_A_659	GGCCAGCCGCCTCGTTAGAGAGG	CALR
CALR_A_66	TGTAGGACCAGGTGATAGATAGG	CALR
CALR_A_662	GCCTCGTTAGAGAGGCCTCGAGG	CALR
CALR_A_664	TCGTTAGAGAGGCCTCGAGGCGG	CALR
CALR_A_665	CGTTAGAGAGGCCTCGAGGCGGG	CALR
CALR_A_674	TTGCTCCTTGAAGTAAATAGTGG	CALR
CALR_A_675	TGCTCCTTGAAGTAAATAGTGGG	CALR
CALR_A_678	GAAGTAAATAGTGGGTTCAGCGG	CALR
CALR_A_68	AGGACCAGGTGATAGATAGGTGG	CALR
CALR_A_680	GTAAATAGTGGGTTCAGCGGCGG	CALR
CALR_A_682	TAGTGGGTTCAGCGGCGGCCAGG	CALR
CALR_A_685	CAGCGGCGGCCAGGCCGACAAGG	CALR
CALR_A_691	CCGACAAGGCCGAGCAGTAGTGG	CALR
CALR_A_692	CGACAAGGCCGAGCAGTAGTGGG	CALR
CALR_A_694	AGGCCGAGCAGTAGTGGGACTGG	CALR
CALR_A_695	GGCCGAGCAGTAGTGGGACTGGG	CALR
CALR_A_699	TAGTGGGACTGGGAGCAGCATGG	CALR
CALR_A_7	CTCATCCTTGGCCTGGCCAGCGG	CALR
CALR_A_701	TGGGACTGGGAGCAGCATGGCGG	CALR
CALR_A_702	GGGACTGGGAGCAGCATGGCGGG	CALR
CALR_A_705	GGGAGCAGCATGGCGGGCCGAGG	CALR
CALR_A_706	GGAGCAGCATGGCGGGCCGAGGG	CALR
CALR_A_707	GAGCAGCATGGCGGGCCGAGGGG	CALR
CALR_A_708	AGCAGCATGGCGGGCCGAGGGGG	CALR
CALR_A_76	AAGTGACACCTGTTTGGCCTTGG	CALR
CALR_A_79	GTTTGGCCTTGGCTTTGCAAAGG	CALR
CALR_A_92	ACCCCAGTTCTGTAATTTCCTGG	CALR
CALR_S_100	GAGATGTCAAACTAGAGGCCGGG	CALR
CALR_S_101	AGATGTCAAACTAGAGGCCGGGG	CALR
CALR_S_103	GTCAAACTAGAGGCCGGGGTAGG	CALR
CALR_S_104	TCAAACTAGAGGCCGGGGTAGGG	CALR
CALR_S_105	CAAACTAGAGGCCGGGGTAGGGG	CALR
CALR_S_117	TATTTGACCCTAGCAGCTTGTGG	CALR
CALR_S_118	ATTTGACCCTAGCAGCTTGTGGG	CALR
CALR_S_120	CCCTAGCAGCTTGTGGGTCTTGG	CALR
CALR_S_139	GCCGCGCTGACCTGCTCCTCTGG	CALR
CALR_S_142	TGCTCCTCTGGTCCCCTAGACGG	CALR
CALR_S_143	GCTCCTCTGGTCCCCTAGACGGG	CALR
CALR_S_145	CCTCTGGTCCCCTAGACGGGTGG	CALR
CALR_S_149	TAGACGGGTGGACTGATCGCTGG	CALR
CALR_S_152	GATTGAATCCAAACACAAACCGG	CALR
CALR_S_154	TCCAAACACAAACCGGATTTTGG	CALR
CALR_S_159	GGCAGATTCGTTCTCAGTTCCGG	CALR
CALR_S_16	CCACTACTGCTCGGCCTTGTCGG	CALR
CALR_S_161	CTCAGTTCCGGCAAATTCTACGG	CALR
CALR_S_164	CGGCAAATTCTACGGTGACCAGG	CALR
CALR_S_168	GGTGACCAGGAGAAAGATAAAGG	CALR
CALR_S_171	AAAGATAAAGGTAAGAACCTAGG	CALR
CALR_S_172	AAGATAAAGGTAAGAACCTAGGG	CALR
CALR_S_174	TAAAGGTAAGAACCTAGGGATGG	CALR
CALR_S_175	AAAGGTAAGAACCTAGGGATGGG	CALR
CALR_S_178	AGGGATGGGTTCTCAGATCCAGG	CALR
CALR_S_18	ACTGCTCGGCCTTGTCGGCCTGG	CALR
CALR_S_180	GATGGGTTCTCAGATCCAGGAGG	CALR
CALR_S_188	CTCCTAATCATCACACAGCTTGG	CALR
CALR_S_189	TCCTAATCATCACACAGCTTGGG	CALR
CALR_S_191	CACACAGCTTGGGTACCCCTAGG	CALR
CALR_S_195	GGTACCCCTAGGAACAGAGCAGG	CALR
CALR_S_196	GTACCCCTAGGAACAGAGCAGGG	CALR
CALR_S_197	TACCCCTAGGAACAGAGCAGGGG	CALR
CALR_S_198	ACCCCTAGGAACAGAGCAGGGGG	CALR
CALR_S_200	CCTAGGAACAGAGCAGGGGGAGG	CALR
CALR_S_203	GAACAGAGCAGGGGGAGGAAGGG	CALR
CALR_S_208	TCGTCTCTATTTCCCACATAAGG	CALR
CALR_S_209	CGTCTCTATTTCCCACATAAGGG	CALR
CALR_S_211	TTTCCCACATAAGGGTACTCCGG	CALR
CALR_S_212	TTCCCACATAAGGGTACTCCGGG	CALR
CALR_S_213	TCCCACATAAGGGTACTCCGGGG	CALR
CALR_S_215	CATAAGGGTACTCCGGGGATTGG	CALR
CALR_S_216	ATAAGGGTACTCCGGGGATTGGG	CALR
CALR_S_22	TGAACCCACTATTTACTTCAAGG	CALR
CALR_S_224	CCTCACTATCGTCCCTTGCTAGG	CALR
CALR_S_225	CTCACTATCGTCCCTTGCTAGGG	CALR
CALR_S_229	GCTAGGGCTACAGACAAGCCAGG	CALR
CALR_S_232	TACAGACAAGCCAGGATGCCCGG	CALR
CALR_S_242	ATTTGAGCCCTTCAGCAACAAGG	CALR
CALR_S_243	TTTGAGCCCTTCAGCAACAAGGG	CALR
CALR_S_247	CAGCAACAAGGGTCAGACGCTGG	CALR
CALR_S_25	TTACTTCAAGGAGCAATTTCTGG	CALR
CALR_S_252	GACGCTGGTAGTGCAGTTCACGG	CALR
CALR_S_259	CACGAACAGAACATCGACTGTGG	CALR
CALR_S_260	ACGAACAGAACATCGACTGTGGG	CALR
CALR_S_261	CGAACAGAACATCGACTGTGGGG	CALR
CALR_S_262	GAACAGAACATCGACTGTGGGGG	CALR
CALR_S_264	CAGAACATCGACTGTGGGGGTGG	CALR
CALR_S_27	TTCAAGGAGCAATTTCTGGACGG	CALR
CALR_S_271	TACGTGAAGCTGTTTCCAGATGG	CALR
CALR_S_273	GAAGCTGTTTCCAGATGGTTTGG	CALR
CALR_S_278	TTGGACCAGACAGACATGCATGG	CALR
CALR_S_283	TCCGAATACAACATCATGTTTGG	CALR
CALR_S_286	ATACAACATCATGTTTGGTGAGG	CALR
CALR_S_287	TACAACATCATGTTTGGTGAGGG	CALR
CALR_S_288	ACAACATCATGTTTGGTGAGGGG	CALR
CALR_S_289	CAACATCATGTTTGGTGAGGGGG	CALR
CALR_S_29	AAGGAGCAATTTCTGGACGGAGG	CALR
CALR_S_293	CCCACCCTGATCCTGACCTCTGG	CALR
CALR_S_297	CTGACCTCTGGTTAGTTAGACGG	CALR
CALR_S_3	GCTGCTGGAGGAGTGACTTAAGG	CALR
CALR_S_35	TAAGCTTTAGTCCCGCCTCGAGG	CALR
CALR_S_370	TTTGAAAAGGGGTGGGGGCGGGG	CALR
CALR_S_378	GGGGAGCCTCTAACTCTAACCGG	CALR
CALR_S_38	GCCTCGAGGCCTCTCTAACGAGG	CALR
CALR_S_380	ACCGGACCTACTTCTCACCAAGG	CALR
CALR_S_382	ACCTACTTCTCACCAAGGCCCGG	CALR
CALR_S_385	CACCAAGGCCCGGACATCTGTGG	CALR
CALR_S_392	TCATGTCATCTTCAACTACAAGG	CALR
CALR_S_393	CATGTCATCTTCAACTACAAGGG	CALR
CALR_S_398	CAAGAACGTGCTCATCAATAAGG	CALR
CALR_S_4	CTGCTGGAGGAGTGACTTAAGGG	CALR
CALR_S_40	TCGAGGCCTCTCTAACGAGGCGG	CALR
CALR_S_402	CAATAAGGATATCCGTTGCAAGG	CALR
CALR_S_405	TATCCGTTGCAAGGTGCATCTGG	CALR
CALR_S_406	ATCCGTTGCAAGGTGCATCTGGG	CALR
CALR_S_407	TCCGTTGCAAGGTGCATCTGGGG	CALR
CALR_S_408	CCGTTGCAAGGTGCATCTGGGGG	CALR
CALR_S_410	TTGCAAGGTGCATCTGGGGGTGG	CALR
CALR_S_412	CATCTGGGGGTGGTAACAAATGG	CALR
CALR_S_415	GGTGGTAACAAATGGCTGTCAGG	CALR
CALR_S_416	GTGGTAACAAATGGCTGTCAGGG	CALR
CALR_S_419	TAACAAATGGCTGTCAGGGGAGG	CALR
CALR_S_42	GGCCTCTCTAACGAGGCGGCTGG	CALR
CALR_S_422	GGCTGTCAGGGGAGGCTCAGAGG	CALR
CALR_S_425	GGGAGGCTCAGAGGCCAGCCTGG	CALR
CALR_S_434	GCTCATCTCCTACTCTCTTCAGG	CALR
CALR_S_442	ACCTGTACACACTGATTGTGCGG	CALR
CALR_S_446	GCGGCCCGATAATACTTATGAGG	CALR
CALR_S_452	GGTGAAGATTGACAACAGTCAGG	CALR
CALR_S_454	GAAGATTGACAACAGTCAGGTGG	CALR
CALR_S_457	GACAACAGTCAGGTGGAGTCAGG	CALR
CALR_S_459	TCAGGTGGAGTCAGGCTCCTTGG	CALR
CALR_S_461	GGTGGAGTCAGGCTCCTTGGAGG	CALR
CALR_S_464	CAGGCTCCTTGGAGGACGATTGG	CALR
CALR_S_465	AGGCTCCTTGGAGGACGATTGGG	CALR
CALR_S_471	CTTGCCGCCTAAGAAGATAAAGG	CALR
CALR_S_480	ATGCTGTGAAGCCTGAAGACTGG	CALR
CALR_S_481	TGCTGTGAAGCCTGAAGACTGGG	CALR
CALR_S_491	CCCTACAGACTCCAAACCTGAGG	CALR
CALR_S_493	ACAGACTCCAAACCTGAGGTTGG	CALR
CALR_S_496	CCAAACCTGAGGTTGGTGCTTGG	CALR
CALR_S_497	CAAACCTGAGGTTGGTGCTTGGG	CALR
CALR_S_5	TGCTGGAGGAGTGACTTAAGGGG	CALR
CALR_S_500	CCTGAGGTTGGTGCTTGGGTGGG	CALR
CALR_S_501	CTGAGGTTGGTGCTTGGGTGGGG	CALR
CALR_S_503	CTTGGGTGGGGCTTCCCTCAAGG	CALR
CALR_S_509	TTCCCTCAAGGTGAAGAGTGTGG	CALR
CALR_S_51	CTTCTGTAATTACTGCTCAGAGG	CALR
CALR_S_511	CCTCAAGGTGAAGAGTGTGGAGG	CALR
CALR_S_52	TTCTGTAATTACTGCTCAGAGGG	CALR
CALR_S_521	TGATCTCCCTGTGTGCCTTCAGG	CALR
CALR_S_524	CCCTGTGTGCCTTCAGGACTGGG	CALR
CALR_S_535	ATGCTAAGAAGCCCGAAGACTGG	CALR
CALR_S_536	TGCTAAGAAGCCCGAAGACTGGG	CALR
CALR_S_54	TACTGCTCAGAGGGCCAACACGG	CALR
CALR_S_556	GATACAGAACCCAGAGTACAAGG	CALR
CALR_S_560	CCCAGAGTACAAGGTGAGCCTGG	CALR
CALR_S_561	CCAGAGTACAAGGTGAGCCTGGG	CALR
CALR_S_566	TGAGCCTGGGACTCTGAGCAGGG	CALR
CALR_S_57	GGGCCAACACGGTAGTCTTCAGG	CALR
CALR_S_570	CTGAGCAGGGCAGTGCACCATGG	CALR
CALR_S_571	TGAGCAGGGCAGTGCACCATGGG	CALR
CALR_S_572	GAGCAGGGCAGTGCACCATGGGG	CALR
CALR_S_58	GGCCAACACGGTAGTCTTCAGGG	CALR
CALR_S_580	ACCAGTTCCCTTCTTCTGCAGGG	CALR
CALR_S_584	CCCTTCTTCTGCAGGGTGAGTGG	CALR
CALR_S_592	GATTGACAACCCCGATTACAAGG	CALR
CALR_S_593	ATTGACAACCCCGATTACAAGGG	CALR
CALR_S_595	ACCCCGATTACAAGGGCACTTGG	CALR
CALR_S_608	CTATGAAAACTTTGCTGTGCTGG	CALR
CALR_S_609	TATGAAAACTTTGCTGTGCTGGG	CALR
CALR_S_611	AAACTTTGCTGTGCTGGGCCTGG	CALR
CALR_S_613	CTGTGCTGGGCCTGGATCTCTGG	CALR
CALR_S_619	GGATCTCTGGCAGGTGAGACTGG	CALR
CALR_S_62	CTTCAGGGACTAAAGCCGCAAGG	CALR
CALR_S_620	GATCTCTGGCAGGTGAGACTGGG	CALR
CALR_S_622	CTCTGGCAGGTGAGACTGGGAGG	CALR
CALR_S_623	TCTGGCAGGTGAGACTGGGAGGG	CALR
CALR_S_630	GAGGGAAGAGGAGGATCCCTAGG	CALR
CALR_S_631	AGGGAAGAGGAGGATCCCTAGGG	CALR
CALR_S_632	GGGAAGAGGAGGATCCCTAGGGG	CALR
CALR_S_642	GAGGGTCAACCCATGAGTAAAGG	CALR
CALR_S_643	AGGGTCAACCCATGAGTAAAGGG	CALR
CALR_S_645	GTCAACCCATGAGTAAAGGGAGG	CALR
CALR_S_647	CCCATGAGTAAAGGGAGGCCTGG	CALR
CALR_S_653	TGGCTGCAAAGTAGTGCTTTTGG	CALR
CALR_S_666	CTTTAATGTACTTATATGCCTGG	CALR
CALR_S_67	TCCTTCCTTCTCCGTCCCTGAGG	CALR
CALR_S_673	ACTTACCCCAACAACCTAGAAGG	CALR
CALR_S_675	TACCCCAACAACCTAGAAGGTGG	CALR
CALR_S_686	AGTTCATAAGGACTGCAGTTTGG	CALR
CALR_S_694	TGTACTTTCTGCACCCAGAATGG	CALR
CALR_S_71	TTCTCCGTCCCTGAGGAGCGTGG	CALR
CALR_S_724	GAGGTGAAATCACCAGCCCAAGG	CALR
CALR_S_726	CAGCCCAAGGTCATATCACCAGG	CALR
CALR_S_73	TCCGTCCCTGAGGAGCGTGGAGG	CALR
CALR_S_731	ACCAGGAAATTACAGAACTGGGG	CALR
CALR_S_74	CCGTCCCTGAGGAGCGTGGAGGG	CALR
CALR_S_740	TTAATTGCAACATTGTGTAATGG	CALR
CALR_S_742	GCAACATTGTGTAATGGTTATGG	CALR
CALR_S_743	CAACATTGTGTAATGGTTATGGG	CALR
CALR_S_745	GTGTAATGGTTATGGGTACATGG	CALR
CALR_S_752	AGGAGACCTTTGCAAAGCCAAGG	CALR
CALR_S_754	TTGCAAAGCCAAGGCCAAACAGG	CALR
CALR_S_758	CTGACCACCTATCTATCACCTGG	CALR
CALR_S_760	TATCTATCACCTGGTCCTACAGG	CALR
CALR_S_763	CTGGTCCTACAGGTCAAGTCTGG	CALR
CALR_S_768	CTTCCTCATTACCAACGATGAGG	CALR
CALR_S_772	CAACGATGAGGCCTACGCTGAGG	CALR
CALR_S_775	GAGGCCTACGCTGAGGAGTTTGG	CALR
CALR_S_779	AGGAGTTTGGCAACGAGACATGG	CALR
CALR_S_78	GAGGAGCGTGGAGGGCGCAGCGG	CALR
CALR_S_780	GGAGTTTGGCAACGAGACATGGG	CALR
CALR_S_781	GAGTTTGGCAACGAGACATGGGG	CALR
CALR_S_784	CGAGACATGGGGTGTTACAAAGG	CALR
CALR_S_786	GACATGGGGTGTTACAAAGGTGG	CALR
CALR_S_787	ACATGGGGTGTTACAAAGGTGGG	CALR
CALR_S_789	GGTGTTACAAAGGTGGGACCAGG	CALR
CALR_S_790	GTGTTACAAAGGTGGGACCAGGG	CALR
CALR_S_793	GTGGGACCAGGGTCCAGTCCTGG	CALR
CALR_S_796	AGGGTCCAGTCCTGGGCTTTTGG	CALR
CALR_S_81	GAGGGCGCAGCGGCCTTCTGCGG	CALR
CALR_S_817	GAGCTATATGCTTTGTACACAGG	CALR
CALR_S_831	ACAAGCAGGATGAAGAGCAGAGG	CALR
CALR_S_833	GGATGAAGAGCAGAGGCTAAAGG	CALR
CALR_S_835	TGAAGAGCAGAGGCTAAAGGAGG	CALR
CALR_S_837	AGAGCAGAGGCTAAAGGAGGAGG	CALR
CALR_S_85	GGCCTTCTGCGGCCGGAGTTAGG	CALR
CALR_S_850	GGAGAAGAAGCGCAAGGAAGAGG	CALR
CALR_S_852	GAAGAAGCGCAAGGAAGAGGAGG	CALR
CALR_S_86	GCCTTCTGCGGCCGGAGTTAGGG	CALR
CALR_S_861	GGAGGTAGACAAGGAAGACGAGG	CALR
CALR_S_863	GGTAGACAAGGAAGACGAGGAGG	CALR
CALR_S_865	CAAGGAAGACGAGGAGGACAAGG	CALR
CALR_S_868	AGACGAGGAGGACAAGGATGAGG	CALR
CALR_S_898	GGAAGATGCTGCCGCTGGCCAGG	CALR
CALR_S_90	CCGGAGTTAGGGCTCGCCCGAGG	CALR
CALR_S_905	CCAGGCCAAGGATGAGCTGTAGG	CALR
CALR_S_906	CAGGCCAAGGATGAGCTGTAGGG	CALR
CALR_S_907	AGGCCAAGGATGAGCTGTAGGGG	CALR
CALR_S_97	CATTAGAGATGTCAAACTAGAGG	CALR
CALR_A_142	TAGAAATATTTAAAAATACCAGG	CALR
CALR_A_166	CTCAGCACTTGGTGTCCCCTAGG	CALR
CALR_A_193	ACTCAGGGTTGTCTATTTCTGGG	CALR
CALR_A_217	CTGCAGAAGAAGGGAACTGGTGG	CALR
CALR_A_237	CCCAGGCTCACCTTGTACTCTGG	CALR
CALR_A_246	CATCTCTTCATCCCAGTCTTCGG	CALR
CALR_A_265	CCCAGTCCTGAAGGCACACAGGG	CALR
CALR_A_293	GCTCGCTCGTCCCAGTCTTCAGG	CALR
CALR_A_32	CCCCCTACCCCCAAAAGCCCAGG	CALR
CALR_A_334	TGAAGAGAGTAGGAGATGAGCGG	CALR
CALR_A_44	GTTGCCAAACTCCTCAGCGTAGG	CALR
CALR_A_530	CCTCCCCCTGCTCTGTTCCTAGG	CALR
CALR_A_532	TCCCCCTGCTCTGTTCCTAGGGG	CALR
CALR_A_590	ACCAAGACCCACAAGCTGCTAGG	CALR
CALR_A_610	CCTCGGGCGAGCCCTAACTCCGG	CALR
CALR_A_74	GGTCAGAAGTGACACCTGTTTGG	CALR
CALR_A_99	CTGGTGATATGACCTTGGGCTGG	CALR
CALR_S_13	CTCCCAGTCCCACTACTGCTCGG	CALR
CALR_S_182	TCAGATCCAGGAGGACTTCCTGG	CALR
CALR_S_322	TTCTTTGGAAGGGAAGCTGAGGG	CALR
CALR_S_375	TGGGGGCGGGGCTCAGTGGTGGG	CALR
CALR_S_387	GGCCCGGACATCTGTGGCCCTGG	CALR
CALR_S_417	TGGTAACAAATGGCTGTCAGGGG	CALR
CALR_S_427	AGGCTCAGAGGCCAGCCTGGTGG	CALR
CALR_S_430	TCAGAGGCCAGCCTGGTGGGTGG	CALR
CALR_S_432	AGAGGCCAGCCTGGTGGGTGGGG	CALR
CALR_S_499	ACCTGAGGTTGGTGCTTGGGTGG	CALR
CALR_S_523	TCCCTGTGTGCCTTCAGGACTGG	CALR
CALR_S_541	CGAAGACTGGGATGAAGAGATGG	CALR
CALR_S_548	TGAAGAGATGGATGGAGAGTGGG	CALR
CALR_S_579	CACCAGTTCCCTTCTTCTGCAGG	CALR
CALR_S_587	TGCAGGGTGAGTGGAAGCCCAGG	CALR
CALR_S_615	GCTGGGCCTGGATCTCTGGCAGG	CALR
CALR_S_626	AGGTGAGACTGGGAGGGAAGAGG	CALR
CALR_S_628	TGAGACTGGGAGGGAAGAGGAGG	CALR
CALR_S_637	CTAGGGGACACCAAGTGCTGAGG	CALR
CALR_S_638	TAGGGGACACCAAGTGCTGAGGG	CALR
CALR_S_682	ATTTGAAAATTAAGTTCATAAGG	CALR
CALR_S_702	TTAGGTACTAAGAAAATGTTTGG	CALR
CALR_S_705	ACTAAGAAAATGTTTGGAGAAGG	CALR
CALR_S_706	CTAAGAAAATGTTTGGAGAAGGG	CALR
CALR_S_729	TCACCAGGAAATTACAGAACTGG	CALR
CALR_S_730	CACCAGGAAATTACAGAACTGGG	CALR
CALR_S_747	ATGGTTATGGGTACATGGACAGG	CALR
CALR_S_794	TGGGACCAGGGTCCAGTCCTGGG	CALR
CALR_S_825	AAAGCAAATGAAAGACAAGCAGG	CALR
CALR_S_839	GCAGAGGCTAAAGGAGGAGGAGG	CALR
CALR_S_900	TGCTGCCGCTGGCCAGGCCAAGG	CALR
CALR_A_112	ATATGTGCCAGGAACCATTCTGG	CALR
CALR_A_87	TTAAAAAAAAACAAGCTGCCTGG	CALR
CALR_A_88	TAAAAAAAAACAAGCTGCCTGGG	CALR
CALR_A_96	ATTTCCTGGTGATATGACCTTGG	CALR
CALR_A_97	TTTCCTGGTGATATGACCTTGGG	CALR
CALR_S_428	GGCTCAGAGGCCAGCCTGGTGGG	CALR
CALR_S_431	CAGAGGCCAGCCTGGTGGGTGGG	CALR
CALR_S_543	GACTGGGATGAAGAGATGGATGG	CALR
CALR_S_565	GTGAGCCTGGGACTCTGAGCAGG	CALR
CALR_S_696	TCTGCACCCAGAATGGTTCCTGG	CALR
CALR_S_698	AATGGTTCCTGGCACATATTAGG	CALR
CALR_S_854	GAAGCGCAAGGAAGAGGAGGAGG	CALR
CALR_S_857	GGAAGAGGAGGAGGTAGACAAGG	CALR
CALR_S_99	AGAGATGTCAAACTAGAGGCCGG	CALR
CALR_S_202	GGAACAGAGCAGGGGGAGGAAGG	CALR
CALR_S_204	AACAGAGCAGGGGGAGGAAGGGG	CALR
CALR_S_321	TTTCTTTGGAAGGGAAGCTGAGG	CALR
CALR_S_809	TTGGGGGTAGGGGGCAGGGCTGG	CALR
CALR_S_841	GAGGCTAAAGGAGGAGGAGGAGG	CALR
CALR_S_871	GGAGGACAAGGATGAGGATGAGG	CALR
CALR_S_873	GGACAAGGATGAGGATGAGGAGG	CALR
CALR_S_875	CAAGGATGAGGATGAGGAGGAGG	CALR
CALR_S_896	GAGGAGGAAGATGCTGCCGCTGG	CALR
CALR_S_374	GTGGGGGCGGGGCTCAGTGGTGG	CALR
CALR_S_547	ATGAAGAGATGGATGGAGAGTGG	CALR
CALR_S_847	GGAGGAGGAGAAGAAGCGCAAGG	CALR
CALR_A_110	CTTAGTACCTAATATGTGCCAGG	CALR
ntc_4_33_m	AAGCCACACAAGTGCCAACANGG	ntc
ntc_19_48_p	GTGGCTTTCGCTTATCCTAGNGG	ntc
ntc_22_51_p	GCTTTCGCTTATCCTAGCGGNGG	ntc
ntc_35_64_m	TAGTTAGGGAATCCTCCGCTNGG	ntc
ntc_43_72_p	GGATTCCCTAACTAGTACCANGG	ntc
ntc_46_75_p	TTCCCTAACTAGTACCACGGNGG	ntc
ntc_49_78_m	CACCTCCGTGGTACTAGTTANGG	ntc
ntc_50_79_m	ACACCTCCGTGGTACTAGTTNGG	ntc
ntc_60_89_p	CCACGGAGGTGTAGAAGTGANGG	ntc
ntc_61_90_m	CCATCACTTCTACACCTCCGNGG	ntc
ntc_92_121_p	TCTTTCGCCCTCACCCGTTCNGG	ntc
ntc_100_129_m	GCGCTGACCAGAACGGGTGANGG	ntc
ntc_101_130_m	TGCGCTGACCAGAACGGGTGNGG	ntc
ntc_106_135_m	AACGATGCGCTGACCAGAACNGG	ntc
ntc_107_136_m	GAACGATGCGCTGACCAGAANGG	ntc
ntc_132_161_m	GTCTTACAGAGTCTTGGACTNGG	ntc
ntc_133_162_m	TGTCTTACAGAGTCTTGGACNGG	ntc
ntc_138_167_m	TATATTGTCTTACAGAGTCTNGG	ntc
ntc_160_189_p	AAGATCTCCAACGCACAGAGNGG	ntc
ntc_161_190_p	AGATCTCCAACGCACAGAGCNGG	ntc
ntc_168_197_m	CTGTGACCCGCTCTGTGCGTNGG	ntc
ntc_179_208_p	GCGGGTCACAGATACTGCGANGG	ntc
ntc_224_253_m	CCGTGCGTATCTCAAGCAGTNGG	ntc
ntc_227_256_p	CTGCTTGAGATACGCACGGTNGG	ntc
ntc_234_263_p	AGATACGCACGGTCGGCCGTNGG	ntc
ntc_237_266_p	TACGCACGGTCGGCCGTTGGNGG	ntc
ntc_247_276_p	CGGCCGTTGGCGGTAAAAGTNGG	ntc
ntc_248_277_p	GGCCGTTGGCGGTAAAAGTCNGG	ntc
ntc_254_283_p	TGGCGGTAAAAGTCGGGTTCNGG	ntc
ntc_255_284_p	GGCGGTAAAAGTCGGGTTCANGG	ntc
ntc_256_285_p	GCGGTAAAAGTCGGGTTCAGNGG	ntc
ntc_257_286_p	CGGTAAAAGTCGGGTTCAGGNGG	ntc
ntc_268_297_p	GGGTTCAGGGGGAAGCTATCNGG	ntc
ntc_269_298_p	GGTTCAGGGGGAAGCTATCTNGG	ntc
ntc_279_308_p	GAAGCTATCTGGGCTGATACNGG	ntc
ntc_280_309_p	AAGCTATCTGGGCTGATACCNGG	ntc
ntc_299_328_m	ATGAGAAATATCAGGGTGCCNGG	ntc
ntc_306_335_m	TCGGTTCATGAGAAATATCANGG	ntc
ntc_307_336_p	CTGATATTTCTCATGAACCGNGG	ntc
ntc_307_336_m	CTCGGTTCATGAGAAATATCNGG	ntc
ntc_325_354_m	AACGTATAGTCATAGCGCCTNGG	ntc
ntc_334_363_p	ATGACTATACGTTCGTCCTANGG	ntc
ntc_348_377_p	GTCCTAAGGATTCTGCCATGNGG	ntc
ntc_351_380_m	TGCCTCATGGCAGAATCCTTNGG	ntc
ntc_353_382_p	AAGGATTCTGCCATGAGGCANGG	ntc
ntc_358_387_p	TTCTGCCATGAGGCACGGAANGG	ntc
ntc_364_393_m	TGGGGCCGTTCCGTGCCTCANGG	ntc
ntc_367_396_p	GAGGCACGGAACGGCCCCAGNGG	ntc
ntc_368_397_p	AGGCACGGAACGGCCCCAGANGG	ntc
ntc_378_407_p	CGGCCCCAGAGGGTCCCGATNGG	ntc
ntc_382_411_m	GGTCCGATCGGGACCCTCTGNGG	ntc
ntc_383_412_m	GGGTCCGATCGGGACCCTCTNGG	ntc
ntc_384_413_m	TGGGTCCGATCGGGACCCTCNGG	ntc
ntc_393_422_m	AACATTCACTGGGTCCGATCNGG	ntc
ntc_394_423_m	AAACATTCACTGGGTCCGATNGG	ntc
ntc_398_427_p	CGGACCCAGTGAATGTTTAANGG	ntc
ntc_403_432_m	AACACCGTTAAACATTCACTNGG	ntc
ntc_404_433_m	CAACACCGTTAAACATTCACNGG	ntc
ntc_408_437_p	GAATGTTTAACGGTGTTGCANGG	ntc
ntc_458_487_m	CGCTCTACTACTCGGGATAGNGG	ntc
ntc_465_494_m	CGATACTCGCTCTACTACTCNGG	ntc
ntc_466_495_m	GCGATACTCGCTCTACTACTNGG	ntc
ntc_2009_2038_p	GCGCGACGTTATACCGTAAANGG	ntc
